# Supplementary material for: Friedel–Crafts Reaction of Acylsilanes: Highly Chemoselective Synthesis of 1-Hydroxy-bis(indolyl)methanes and 1-Silyl-bis(indolyl)methanes Derivatives
Source: MDPI journal article supplement (doi:10.3390/molecules28155685), 2023-07-27

## *Supporting Information*

### **Friedel-Crafts Reaction of Acylsilanes: Highly Chemoselective Synthesis of 1-Hydroxy-bis(indolyl)methanes and 1-Silyl-bis(indolyl)methanes Derivatives**

Qi Li,<sup>†</sup> Xiu-Xia Liang,<sup>†</sup> Wang Zhang,<sup>†</sup> and Man-Yi Han<sup>\*†</sup>

<sup>†</sup>Key Laboratory of Green and Precise Synthetic Chemistry and Applications, Ministry of Education; College of Chemistry and Materials Science, Huaibei Normal University, Huaibei, Anhui 235000, P.R. China

E-Mail: hanmy10@126.com; hanmy@chnu.edu.cn

### *Table of Contents*

1. The reaction of acylsilane with indole containing hydroxy groups at different positions.....S2
2. <sup>1</sup>H and <sup>13</sup>C NMR spectra of the products.....S3

**1. The reaction of acylsilane with indole containing hydroxy groups at different positions**

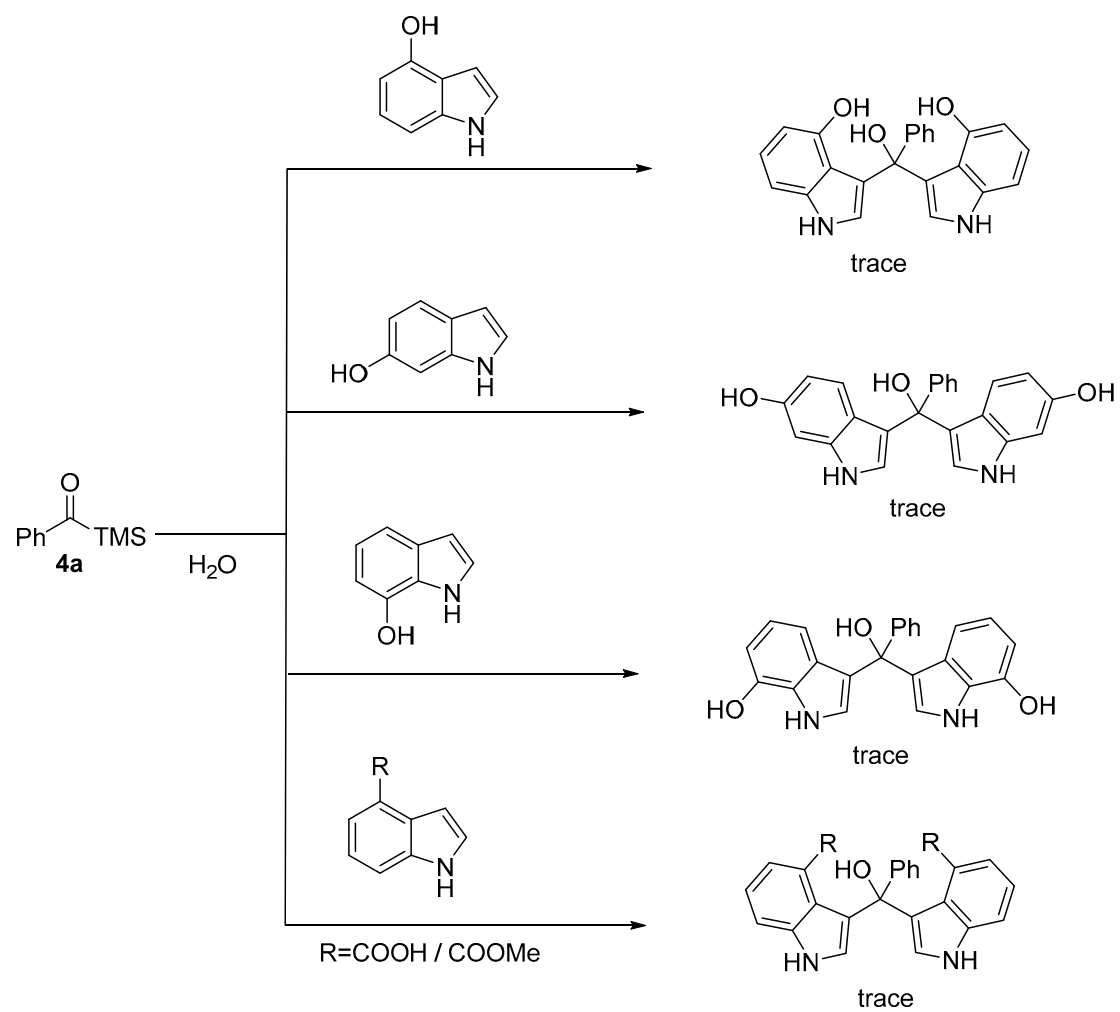

## 2. $^1\text{H}$ and $^{13}\text{C}$ NMR spectra of the products

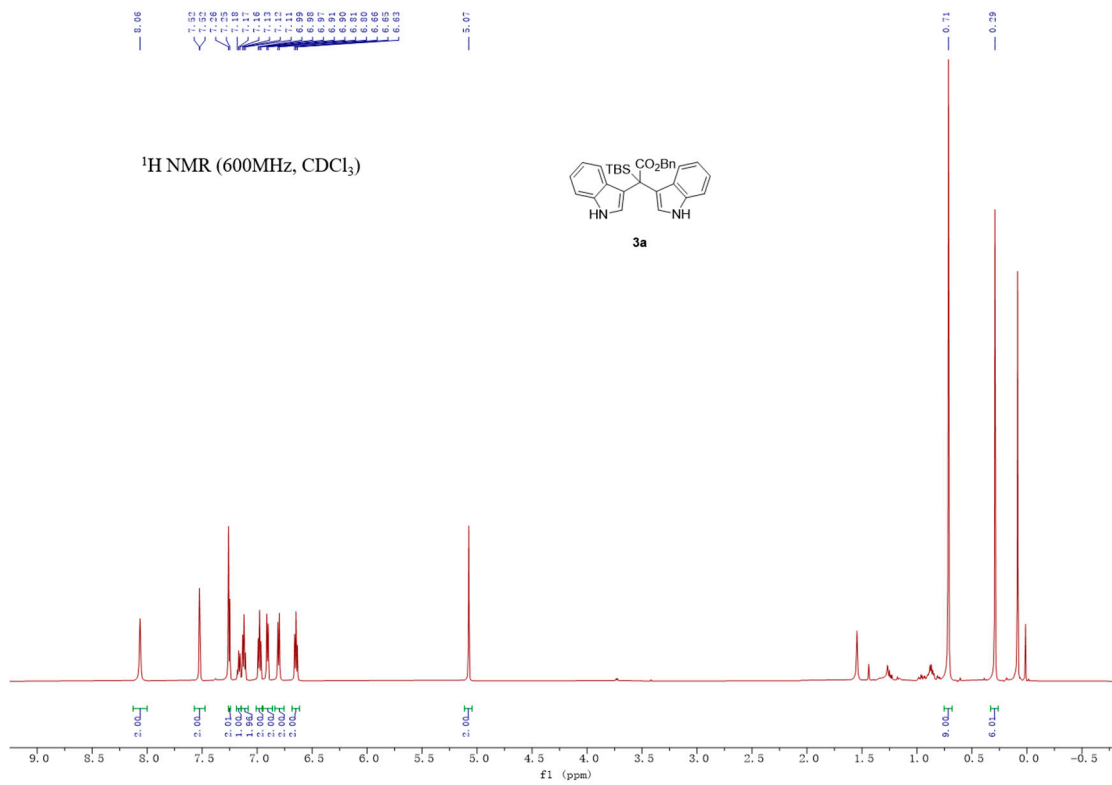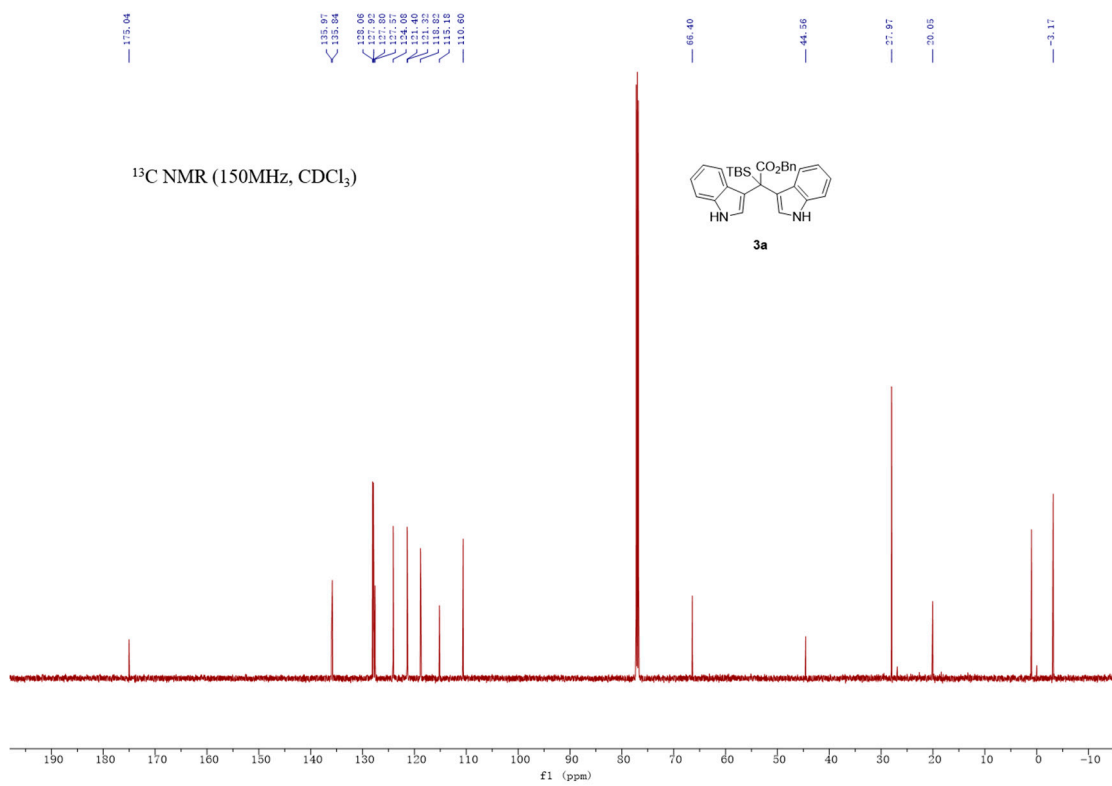

8.69  
7.48  
7.25  
7.23  
7.20  
6.98  
6.97  
6.83  
6.69  
6.67

4.13  
4.12  
4.11  
4.10

1.06  
1.05  
1.04  
0.73  
0.35

$^1\text{H}$  NMR (600MHz,  $\text{CDCl}_3$ )

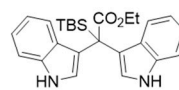

**3b**

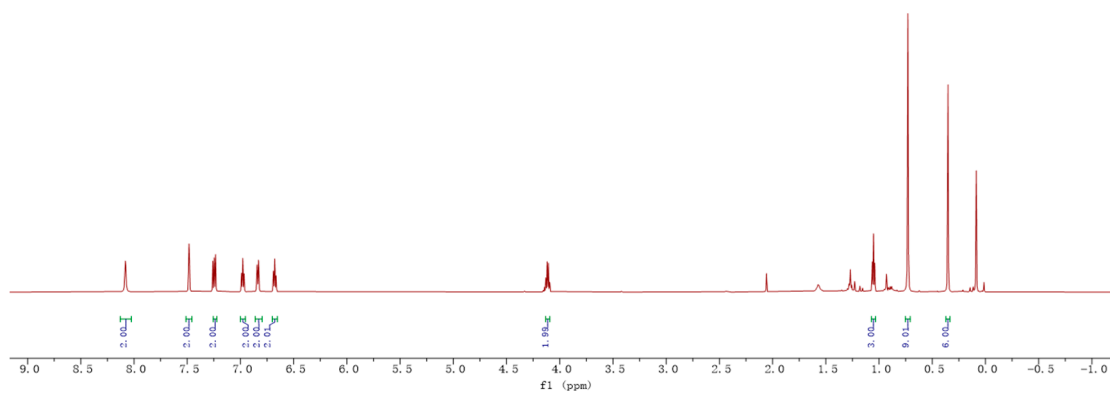

175.20  
135.84  
127.75  
127.45  
127.42  
121.25  
118.59  
115.35  
110.65

60.61  
44.44

38.00  
20.01  
14.03  
-3.05

$^{13}\text{C}$  NMR (150MHz,  $\text{CDCl}_3$ )

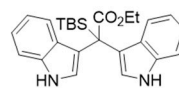

**3b**

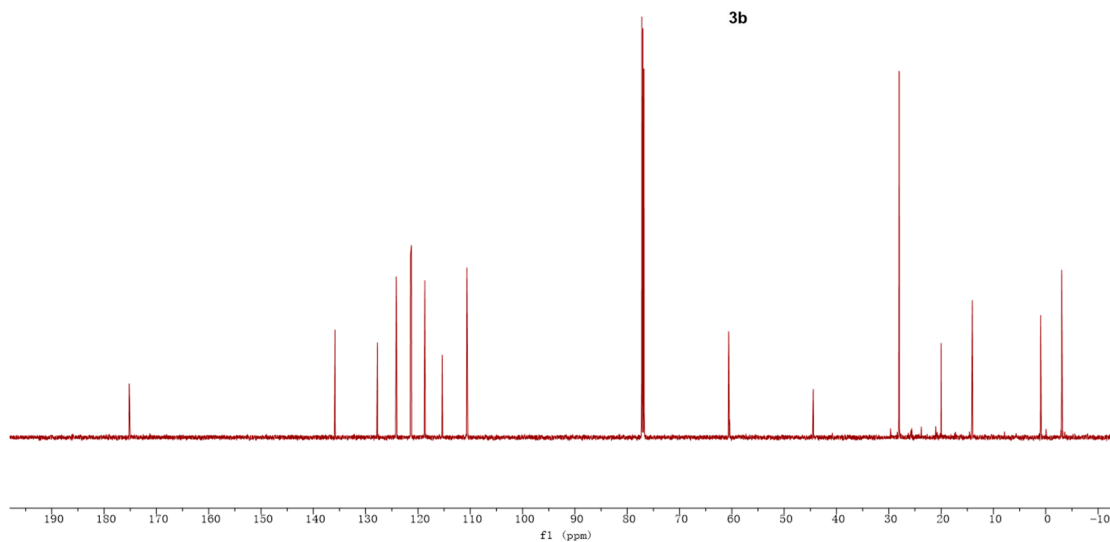



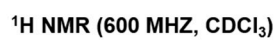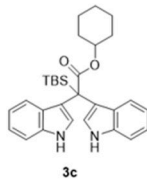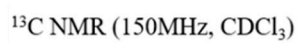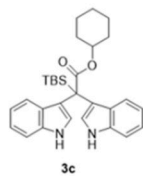

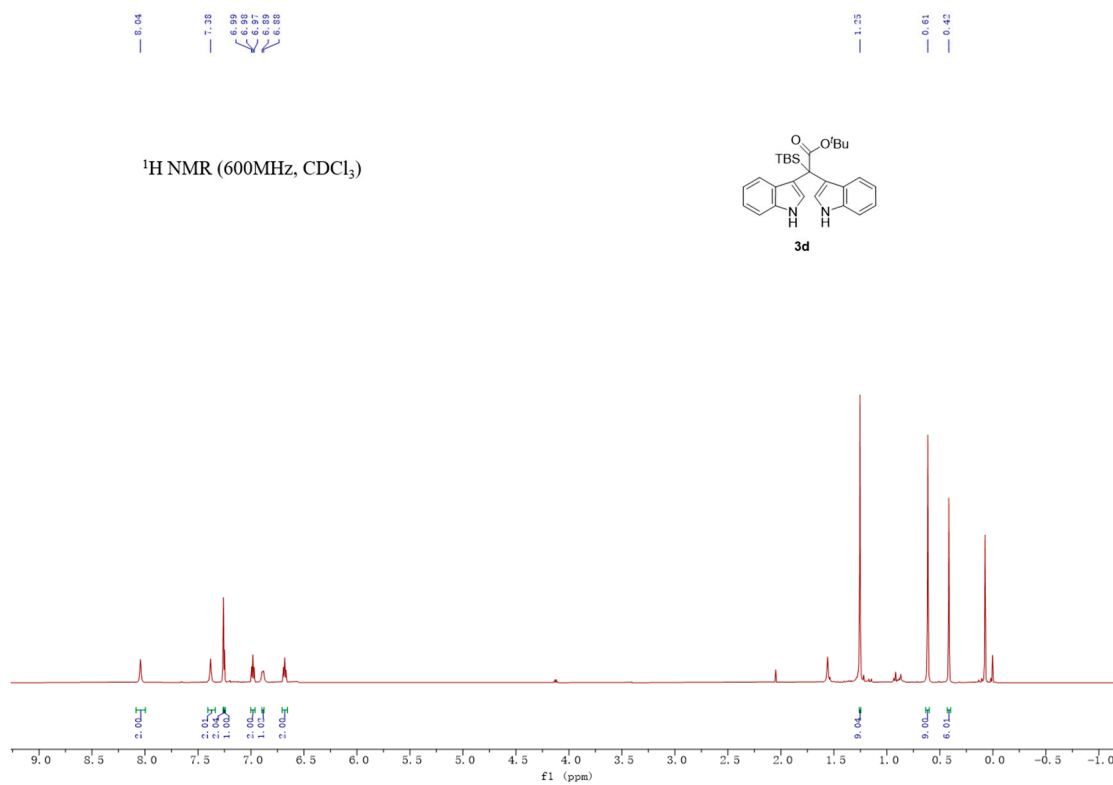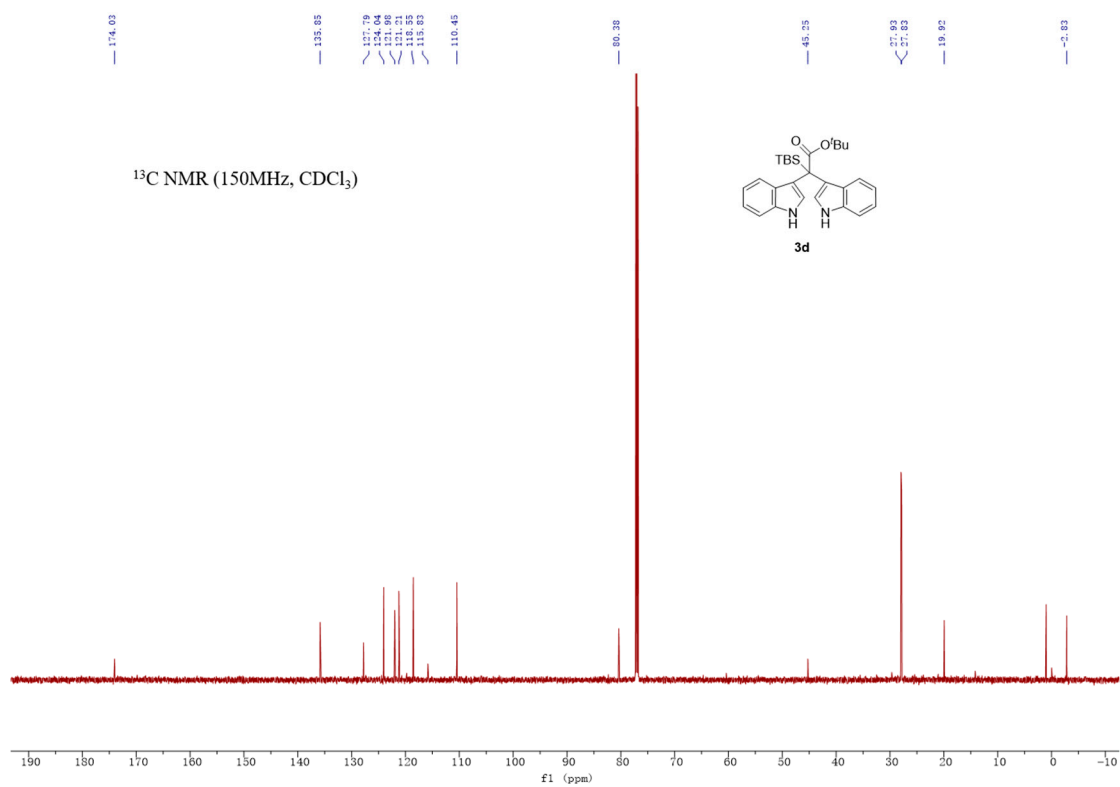

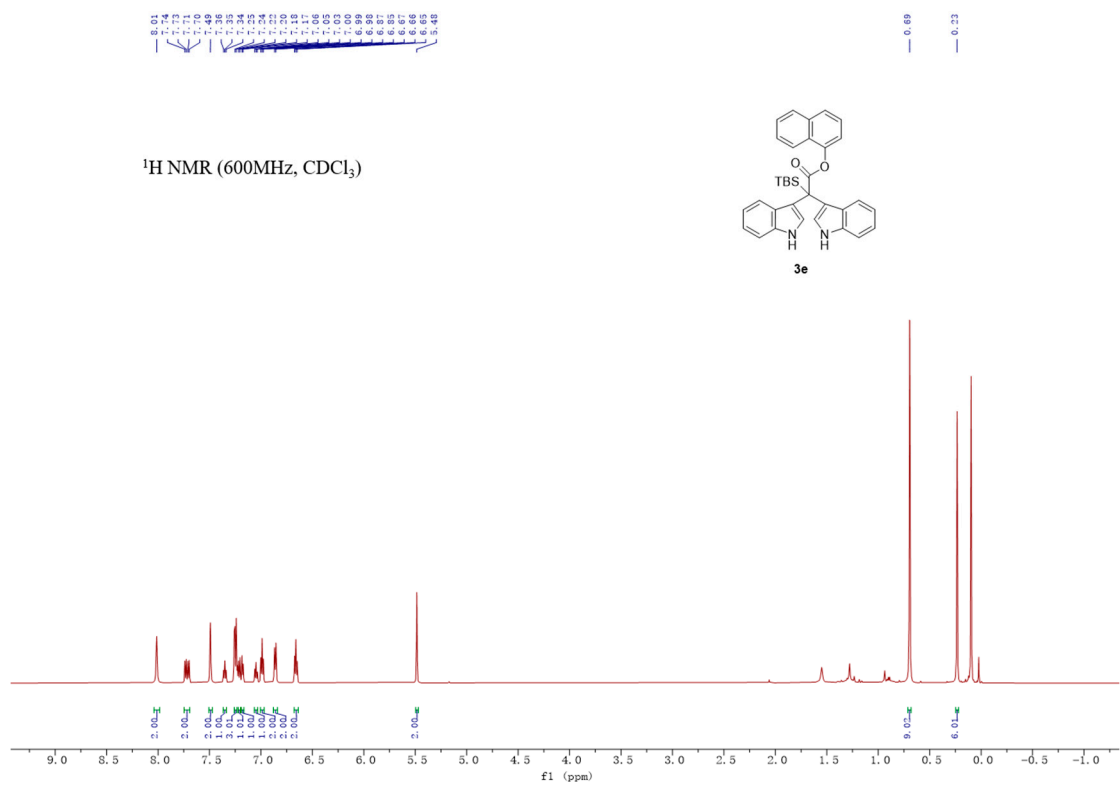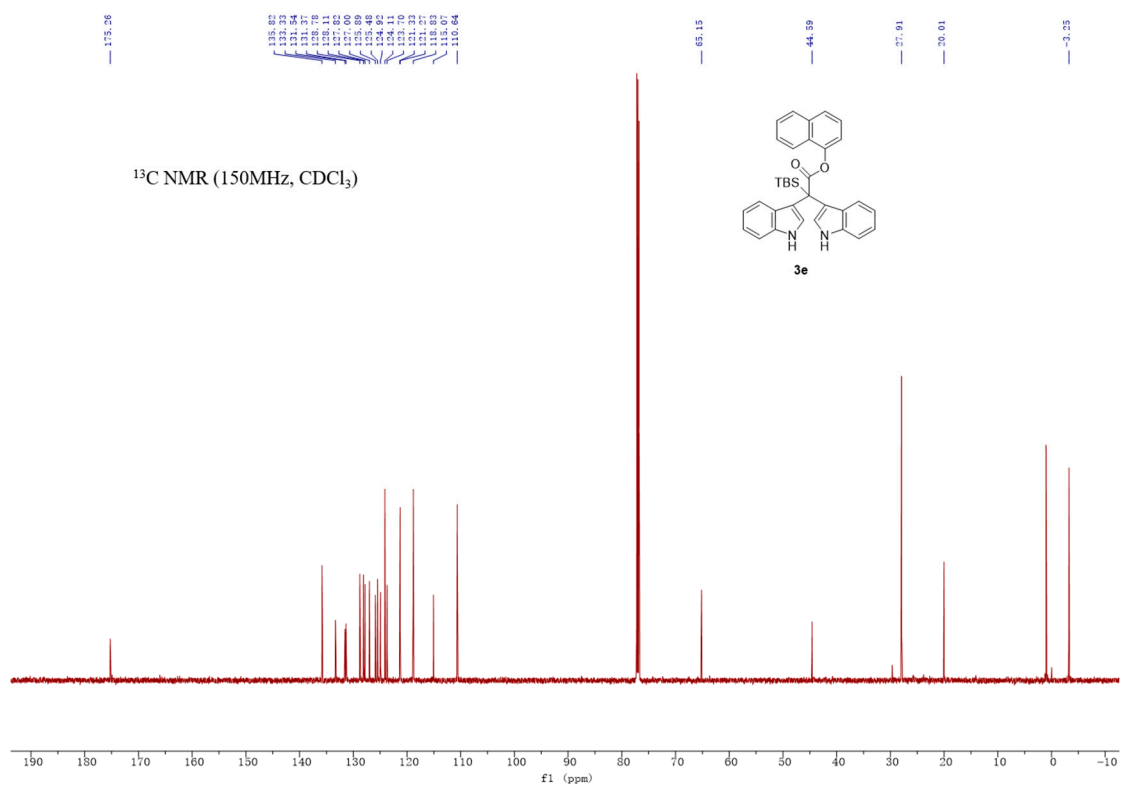

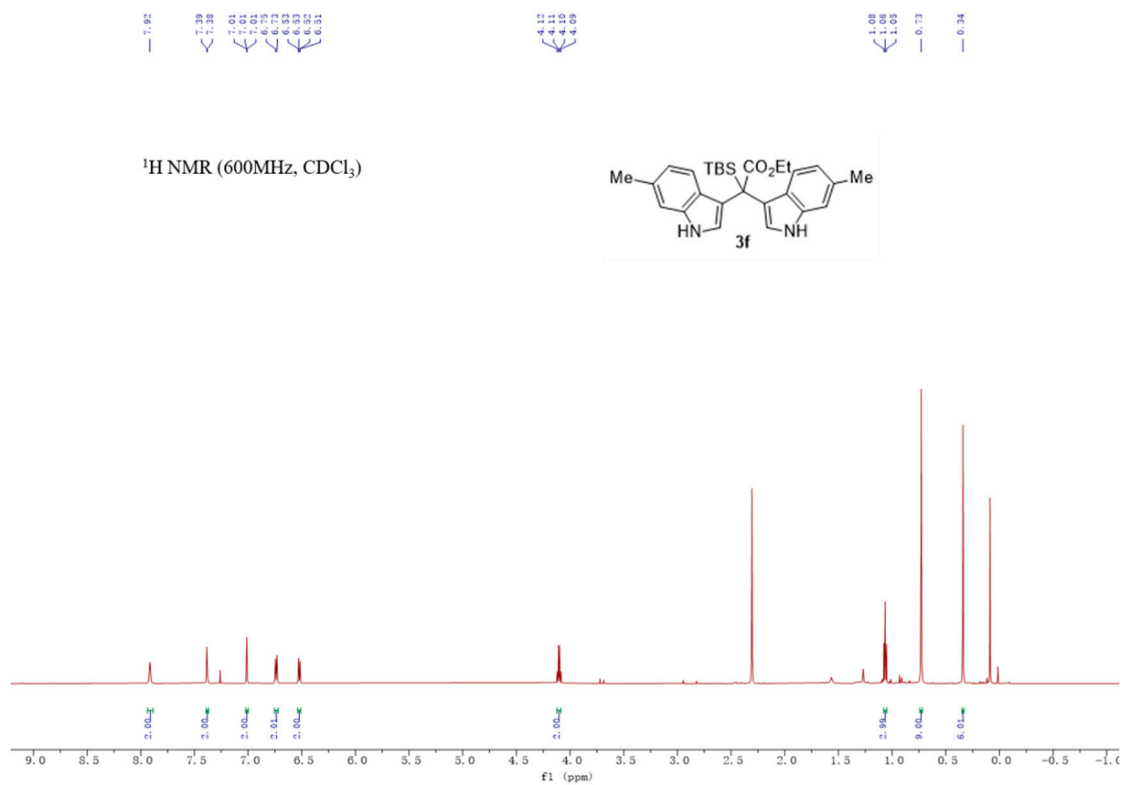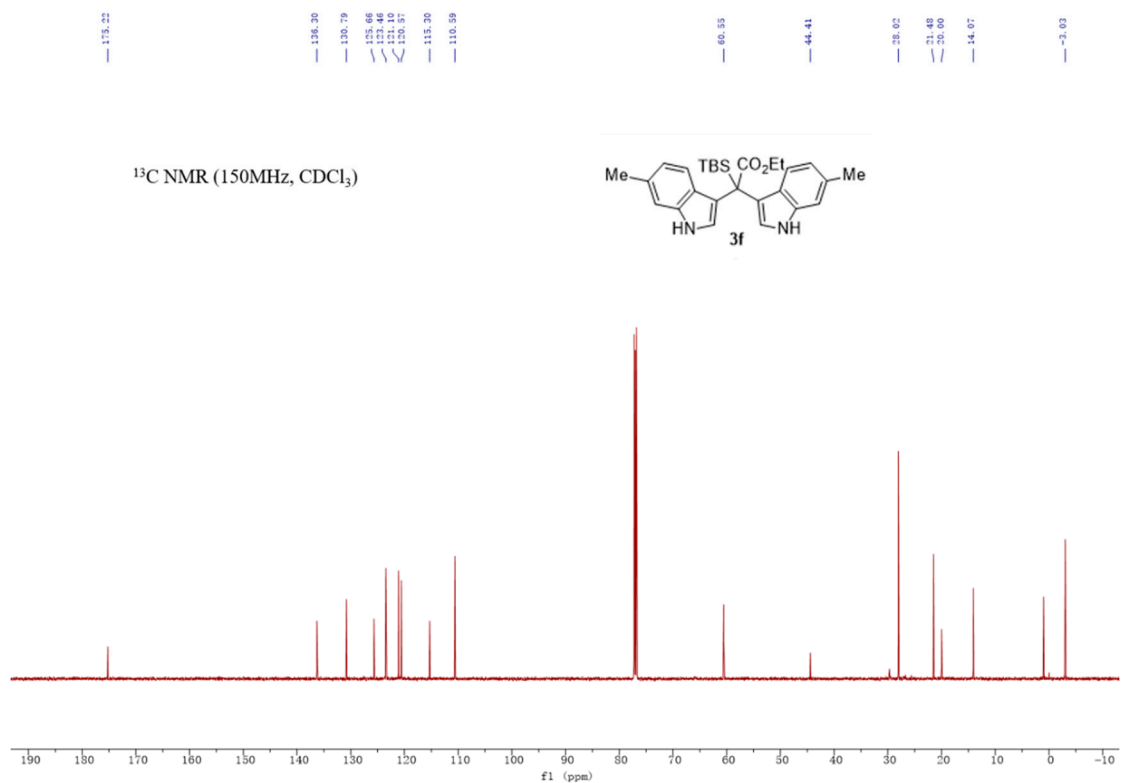





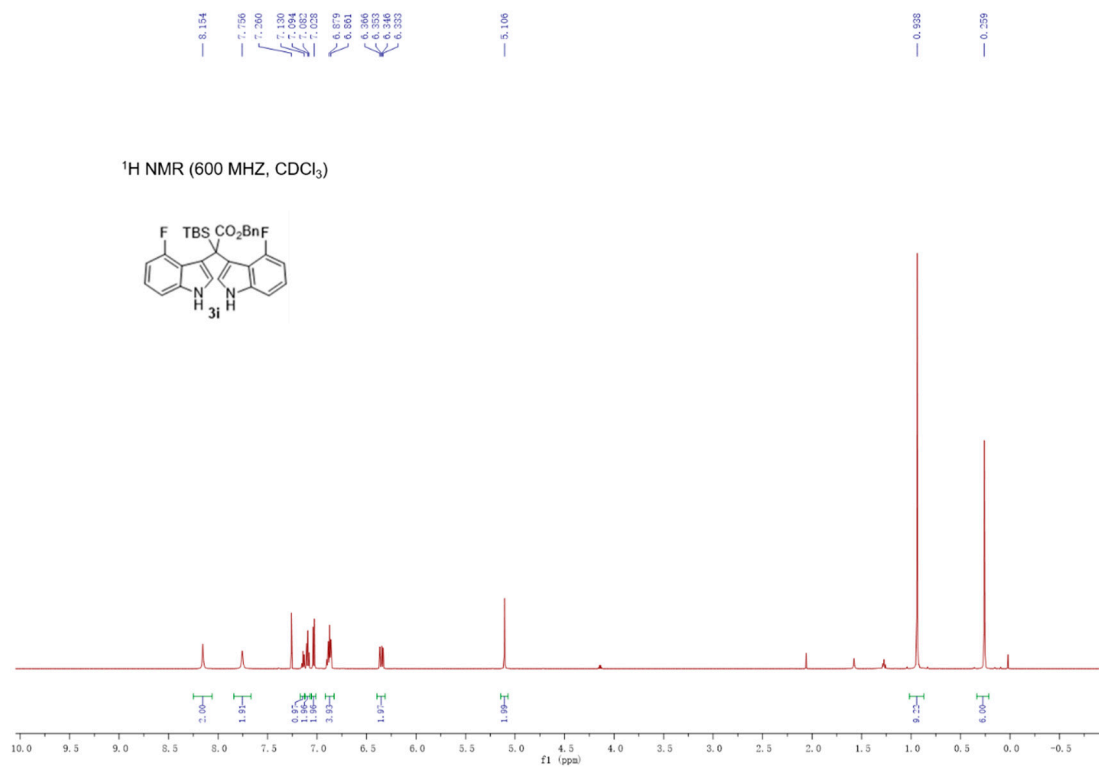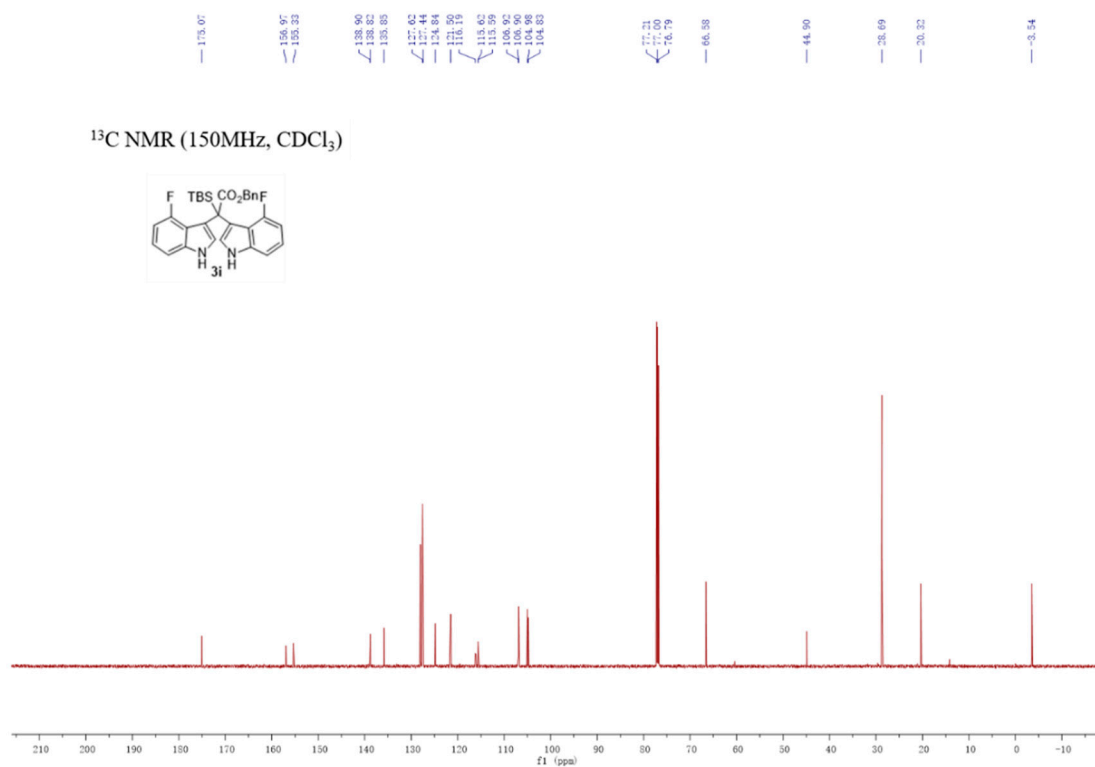

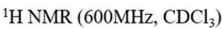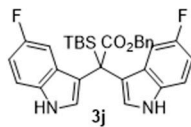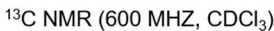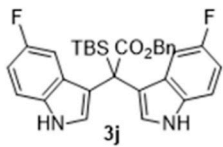





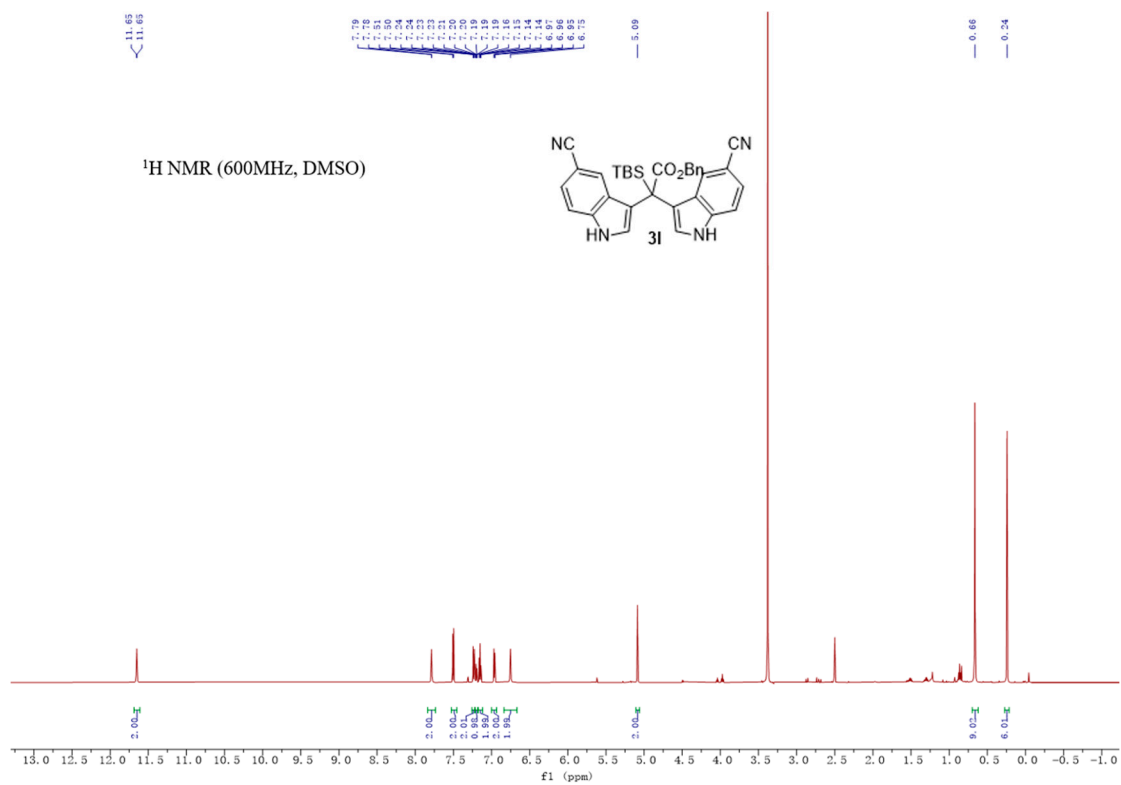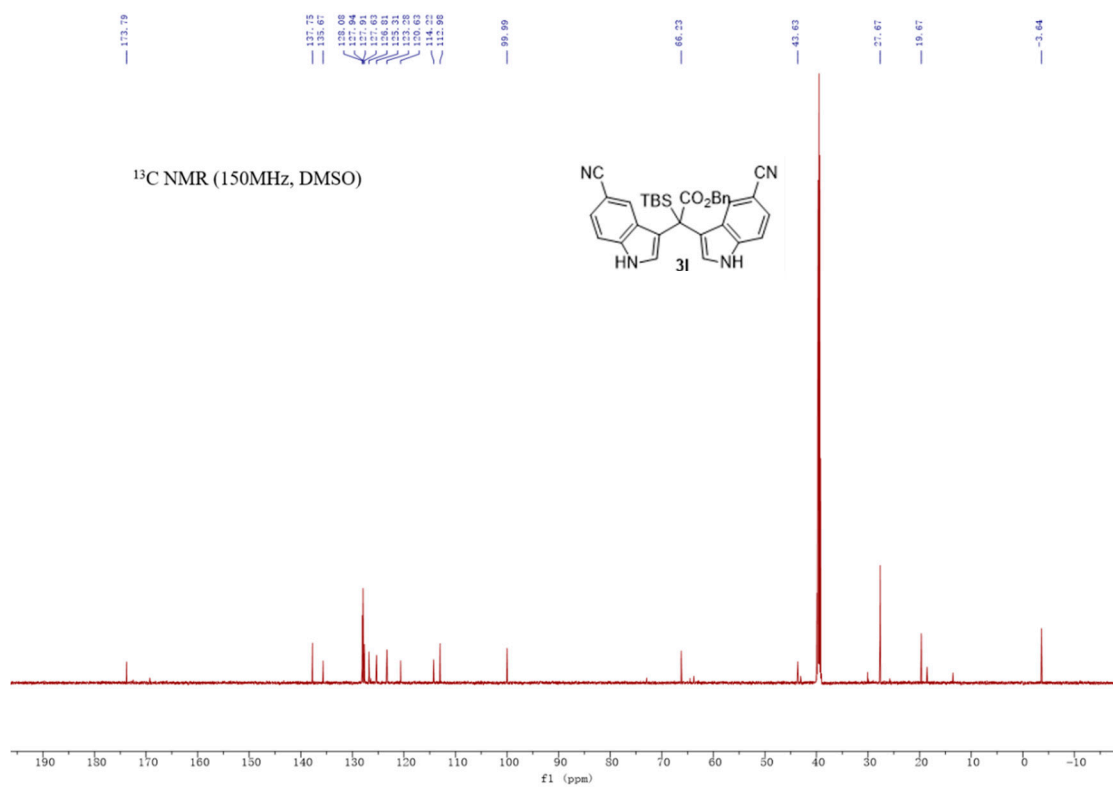



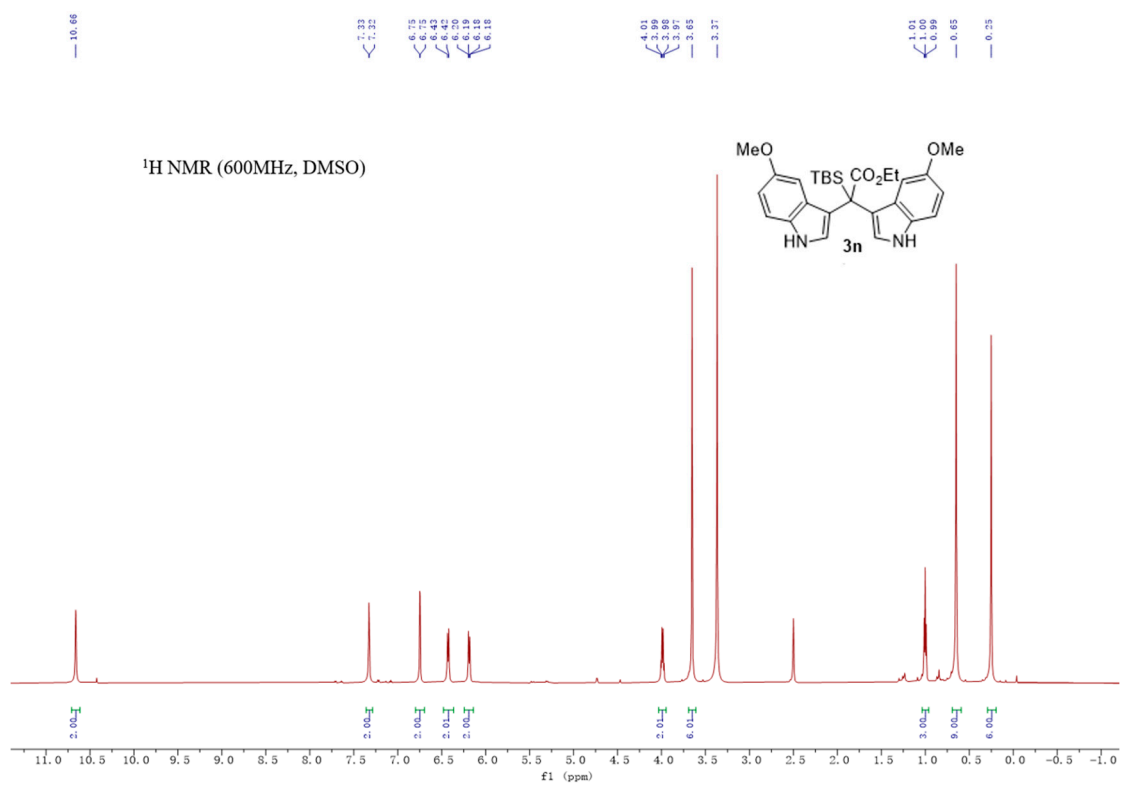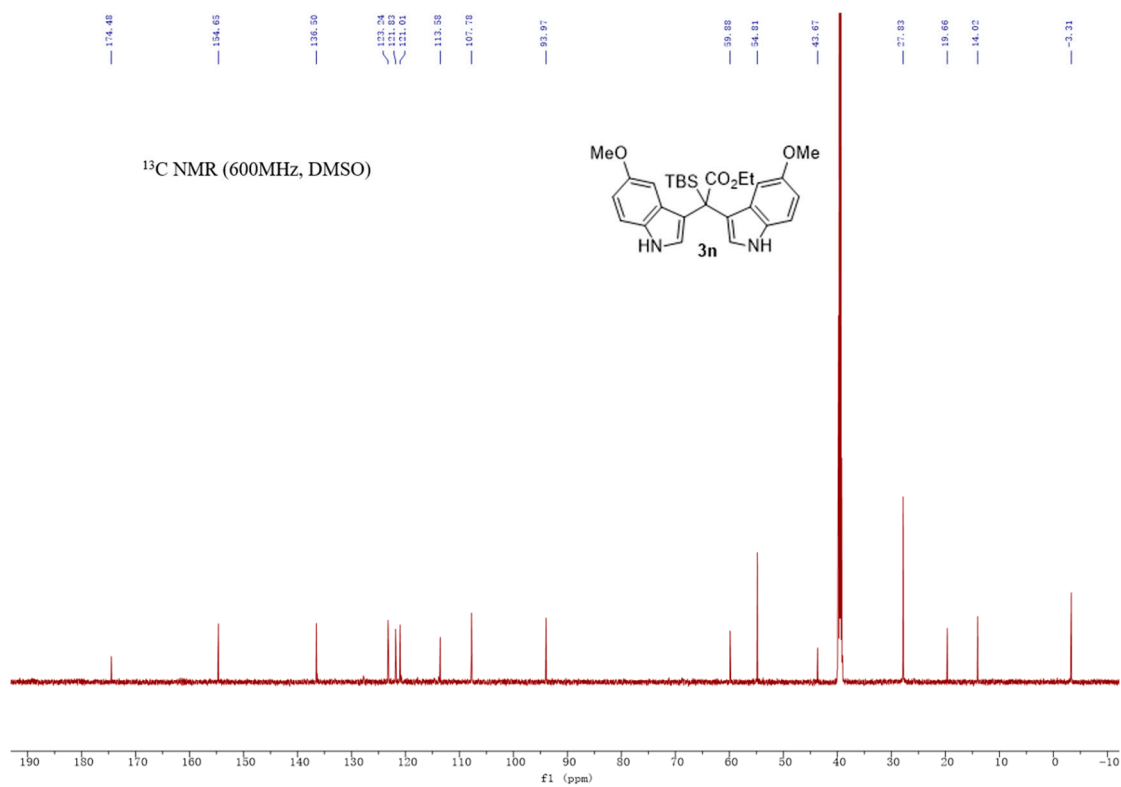

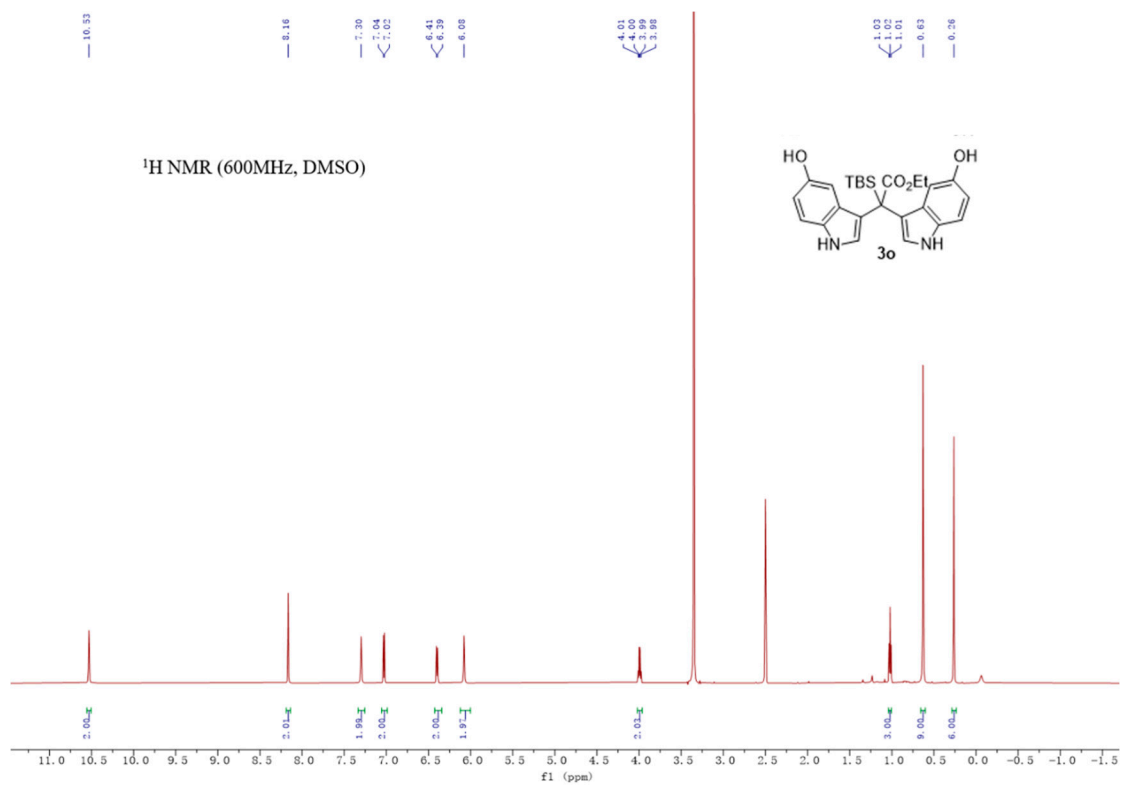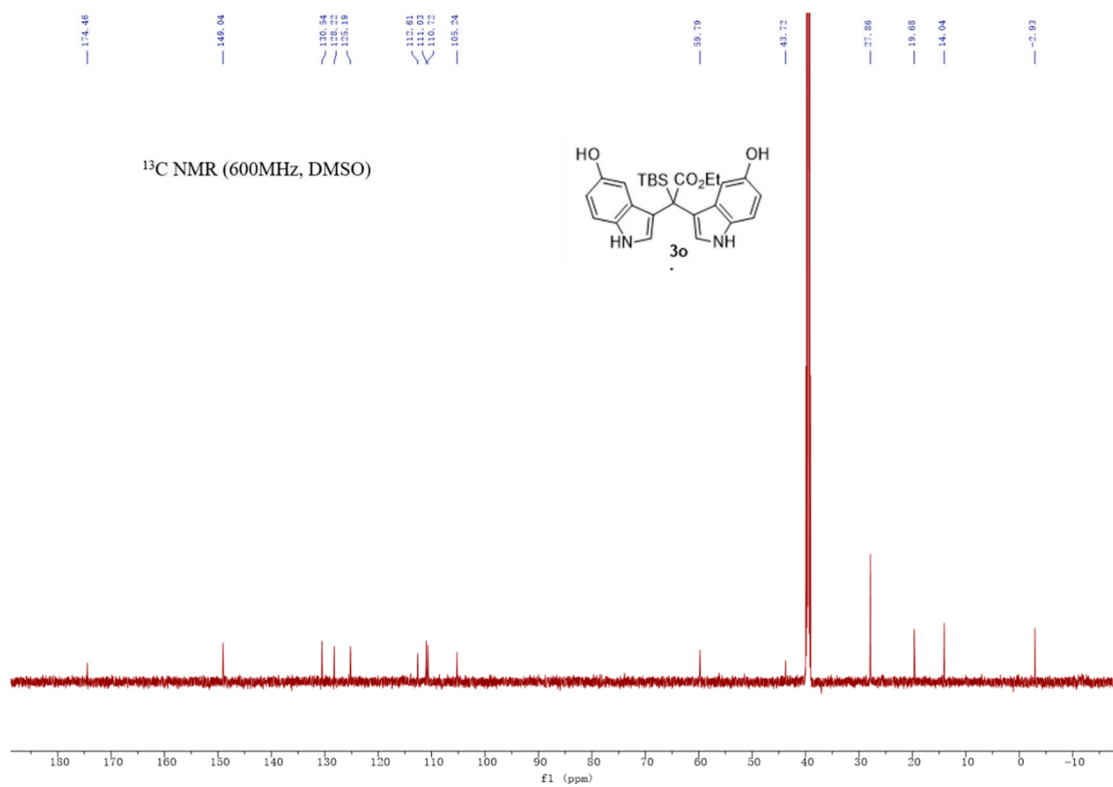

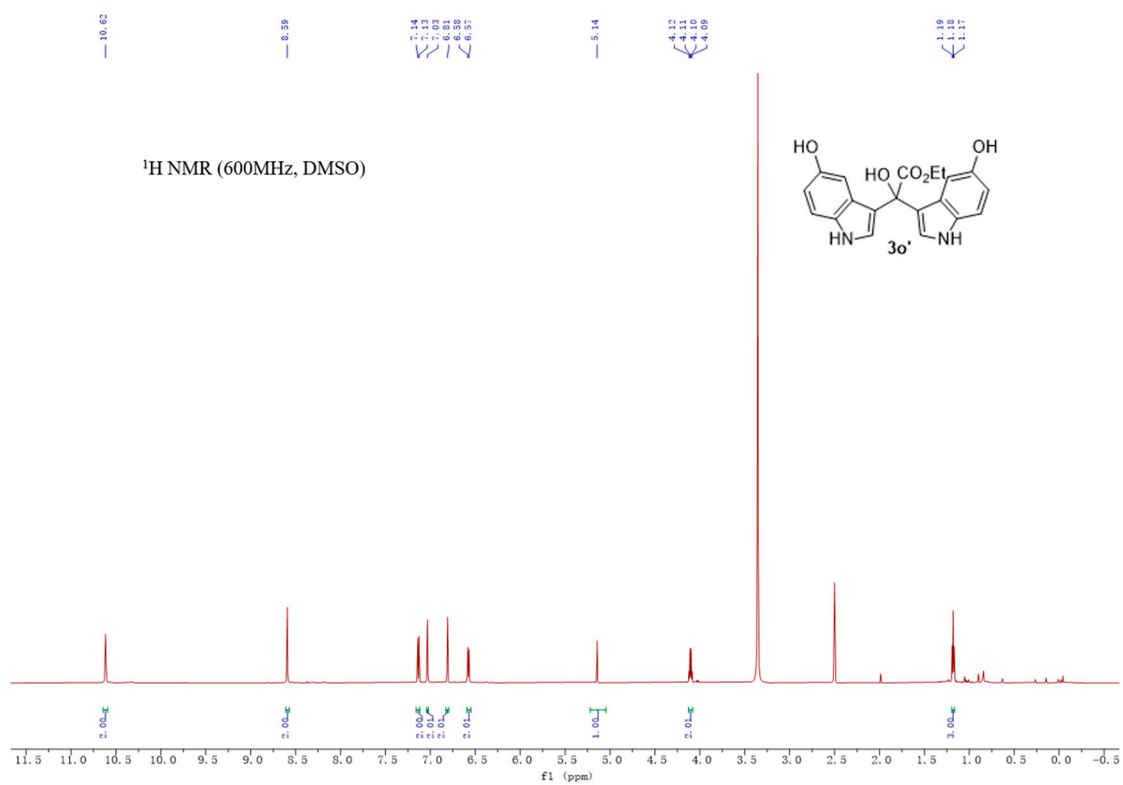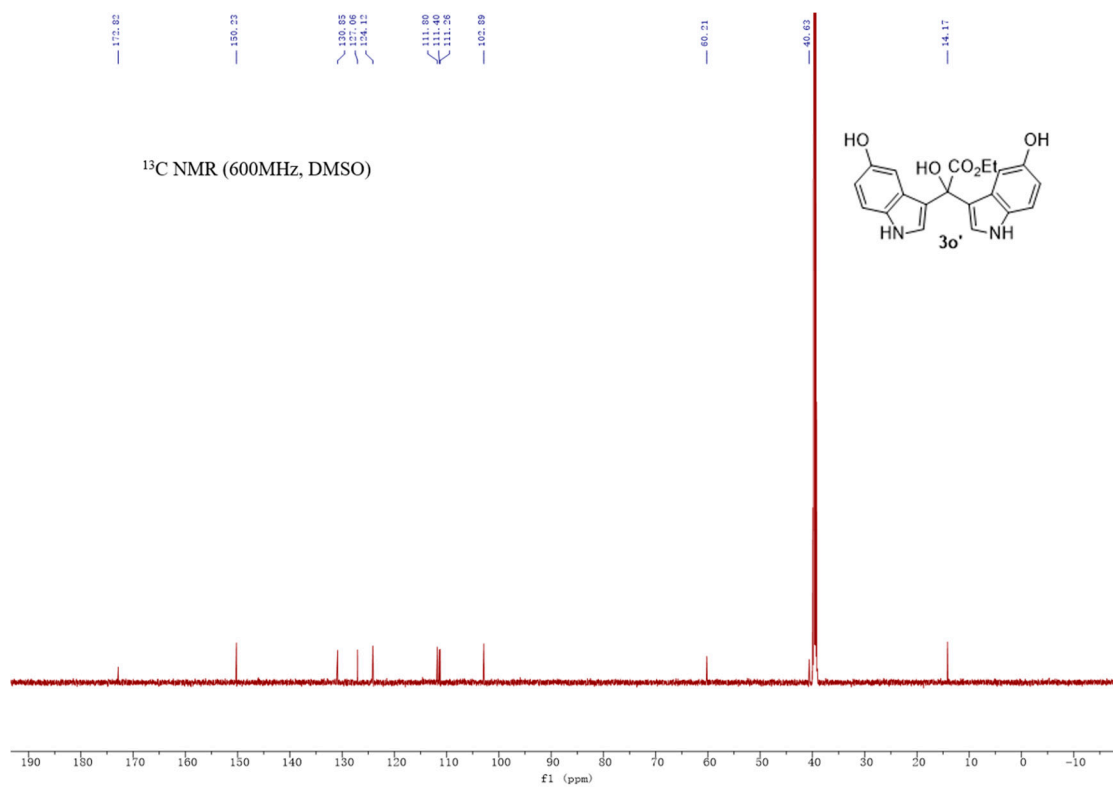

<sup>1</sup>H NMR (600MHz, Acetone)

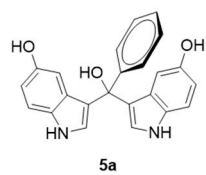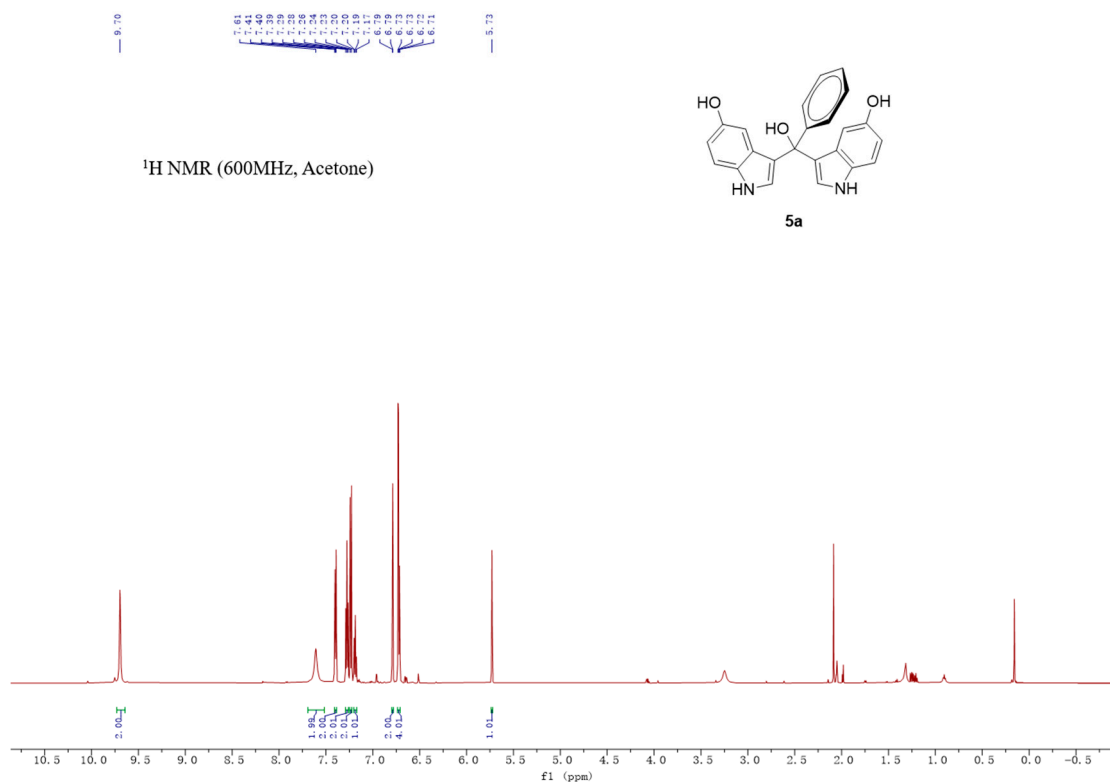

<sup>13</sup>C NMR (600MHz, DMSO)

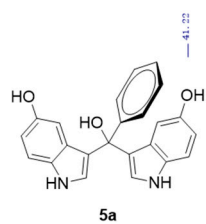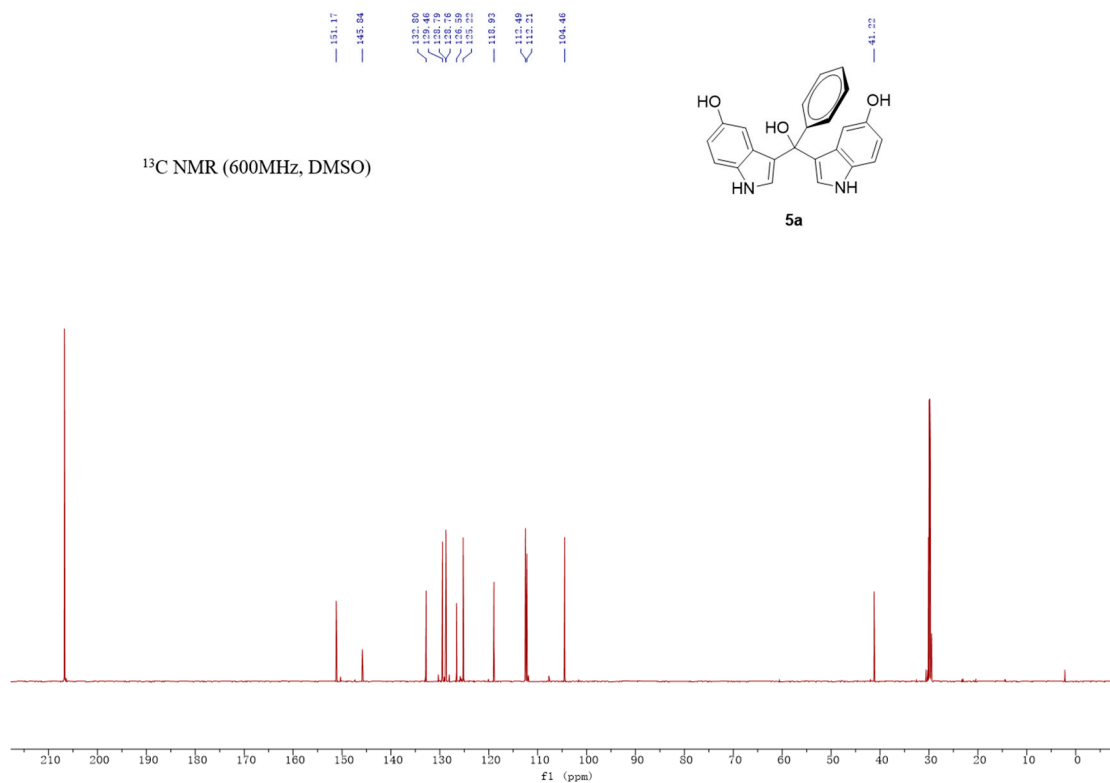

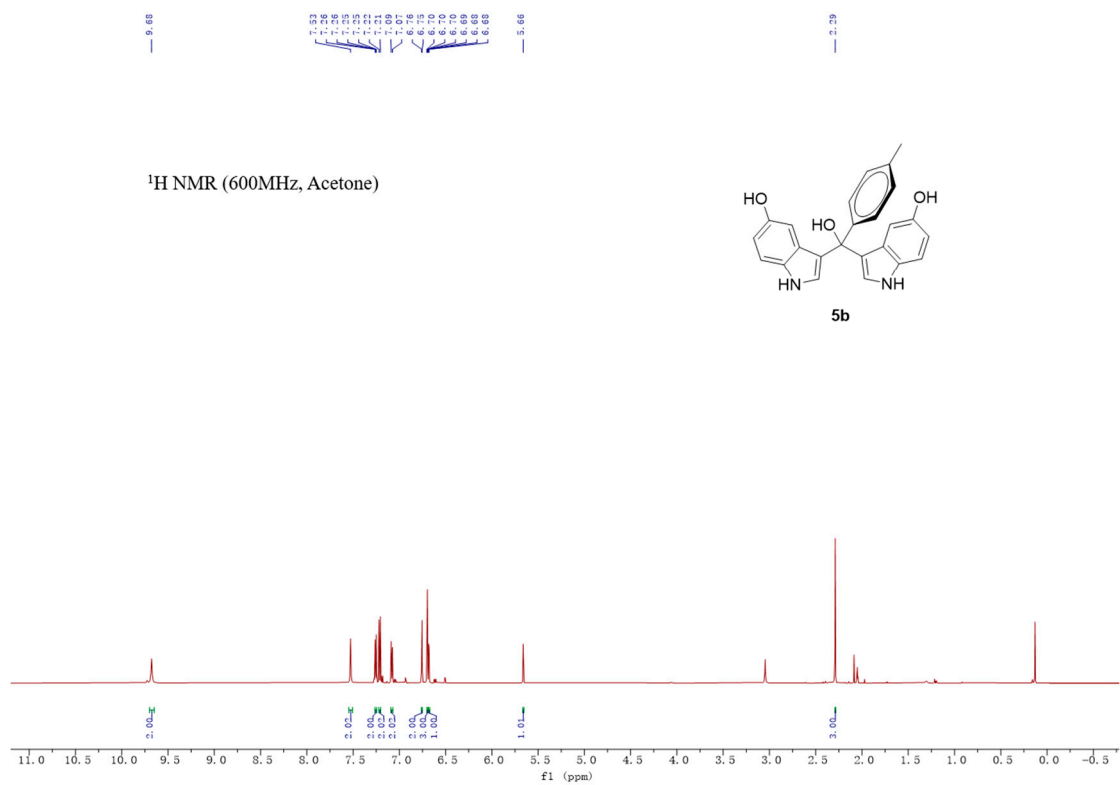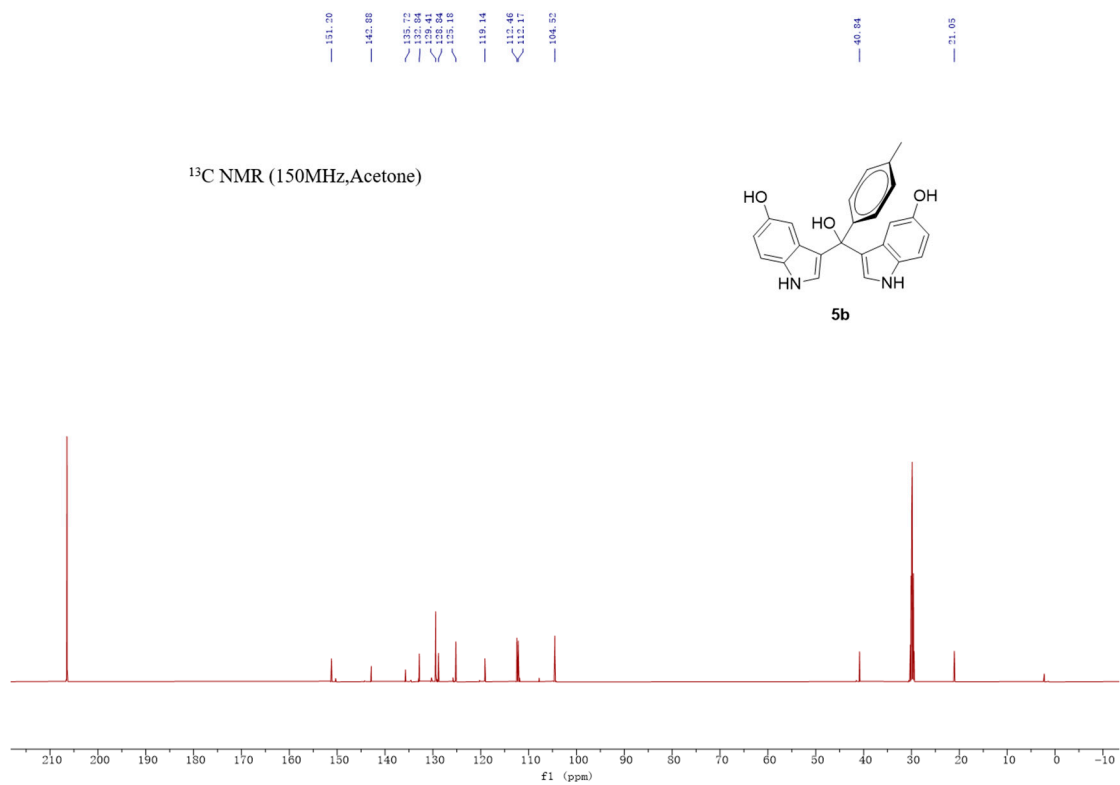



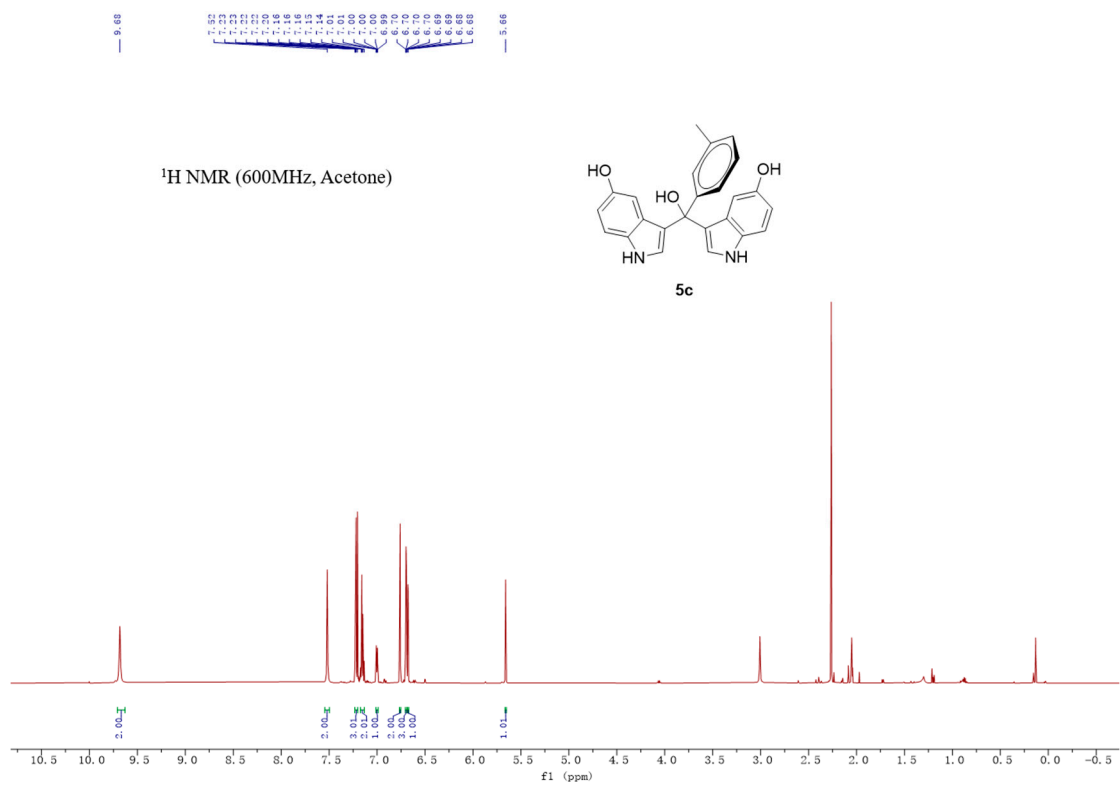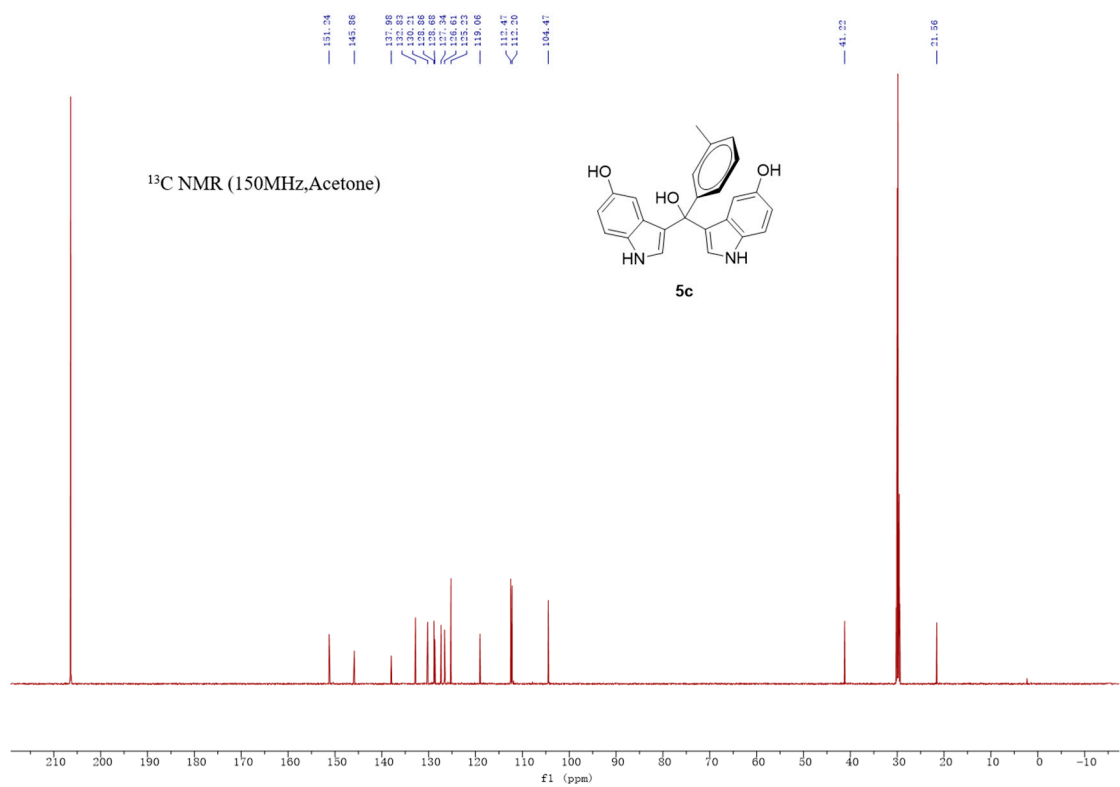

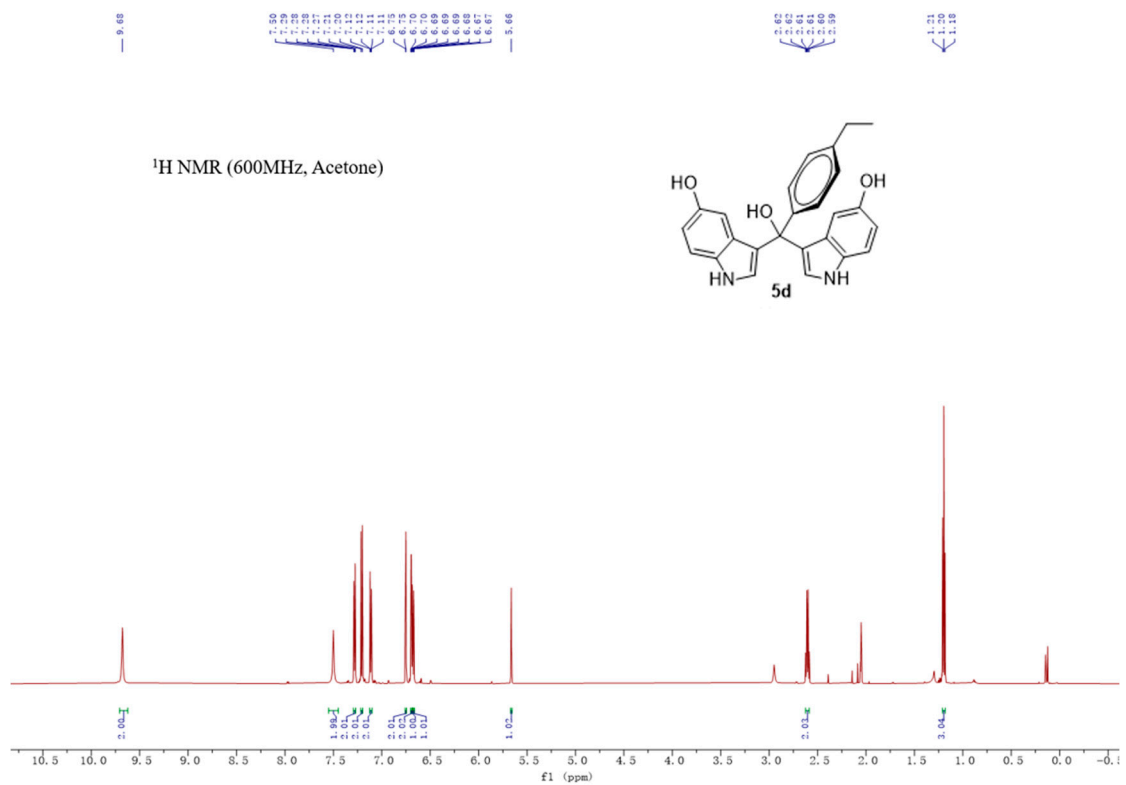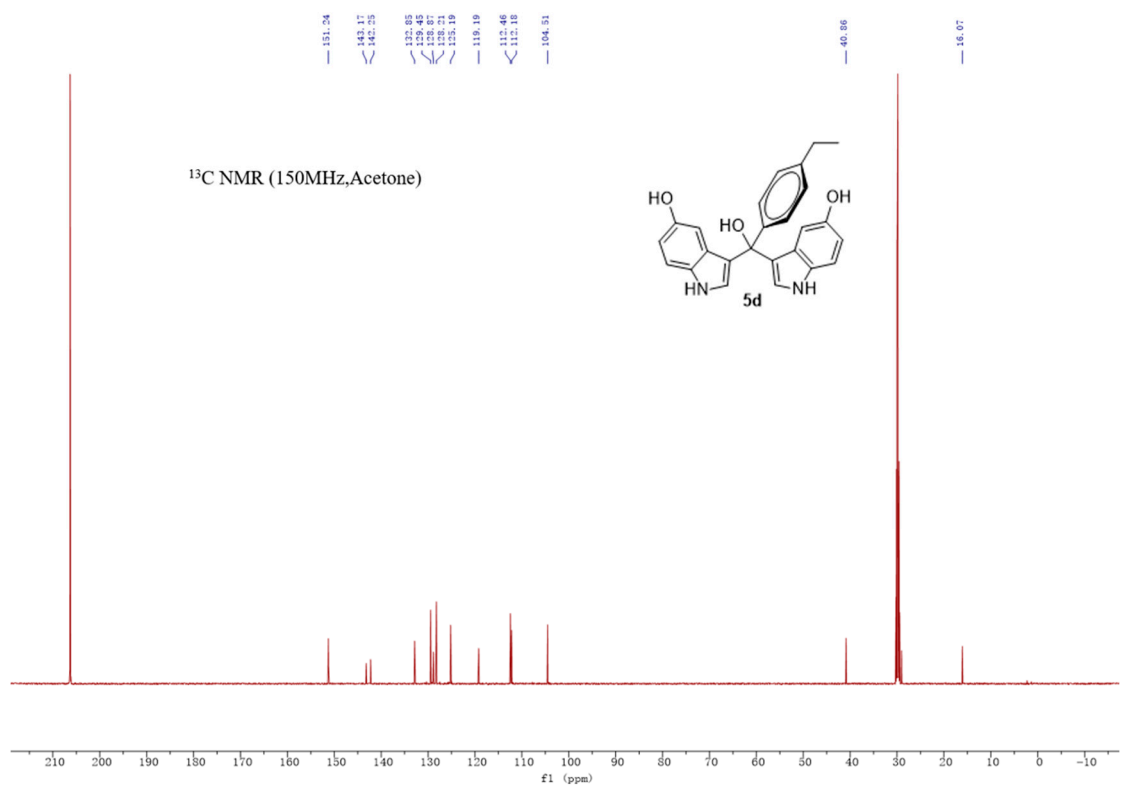



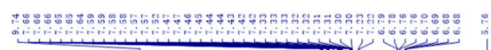

$^1\text{H}$  NMR (600MHz, Acetone)

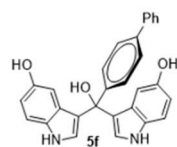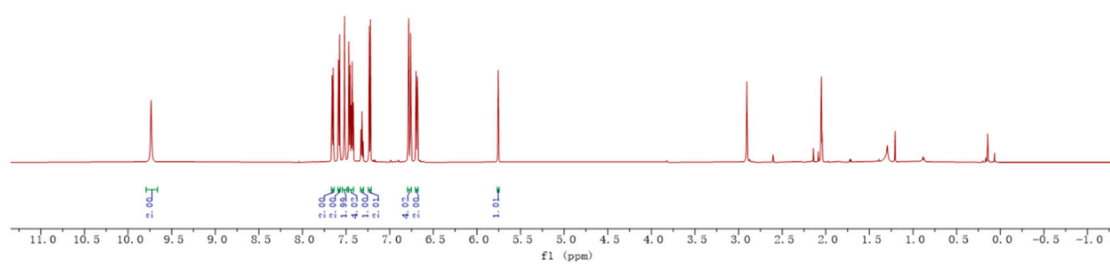

$^{13}\text{C}$  NMR (150MHz, Acetone)

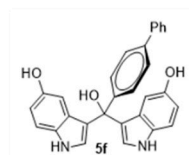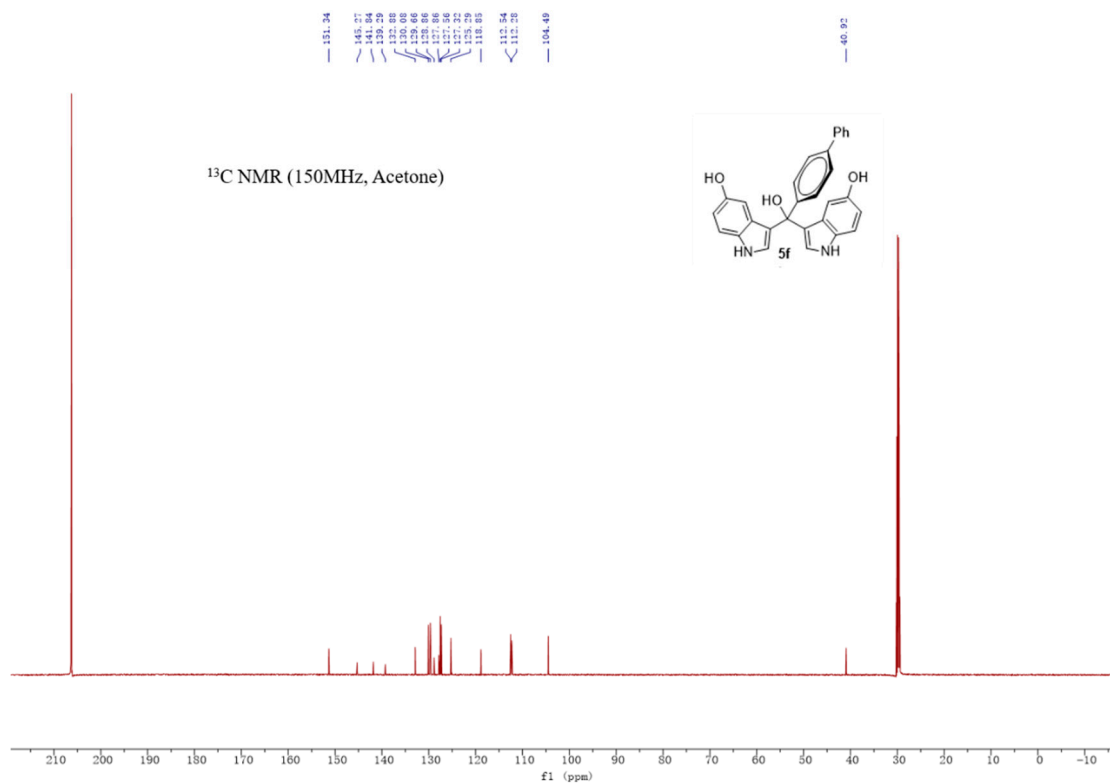

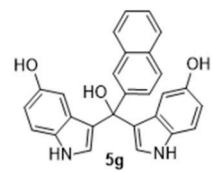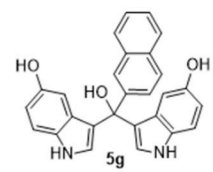

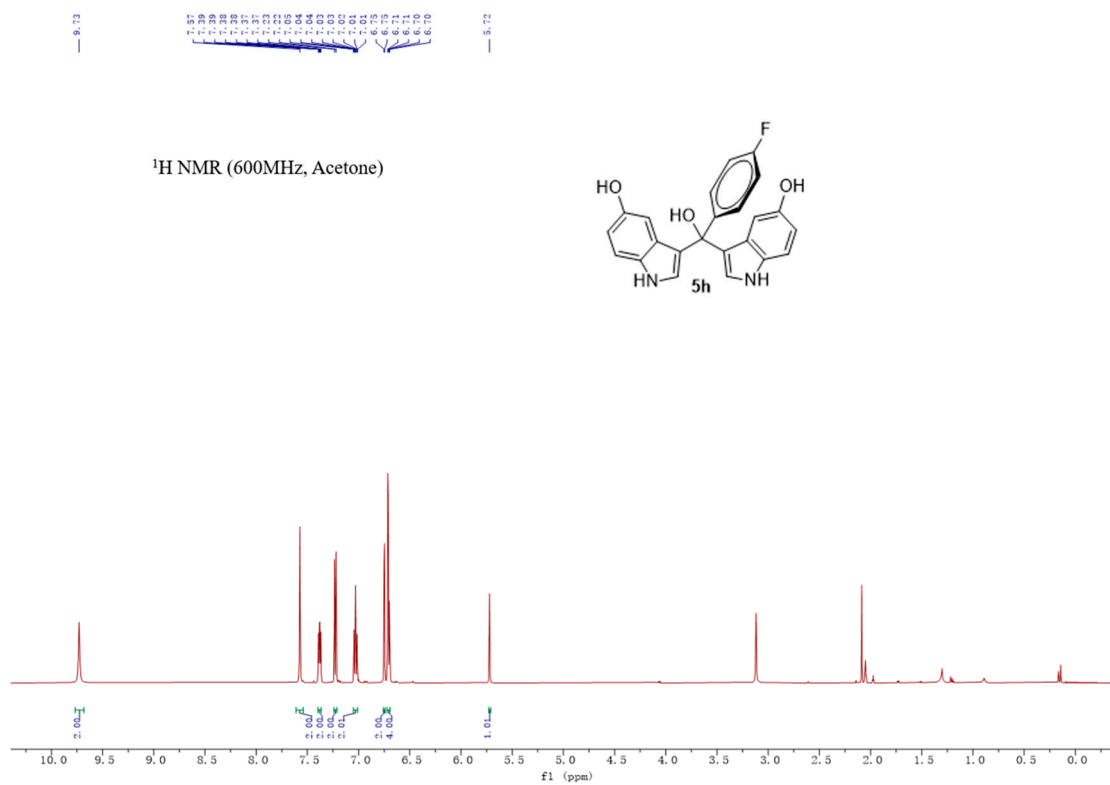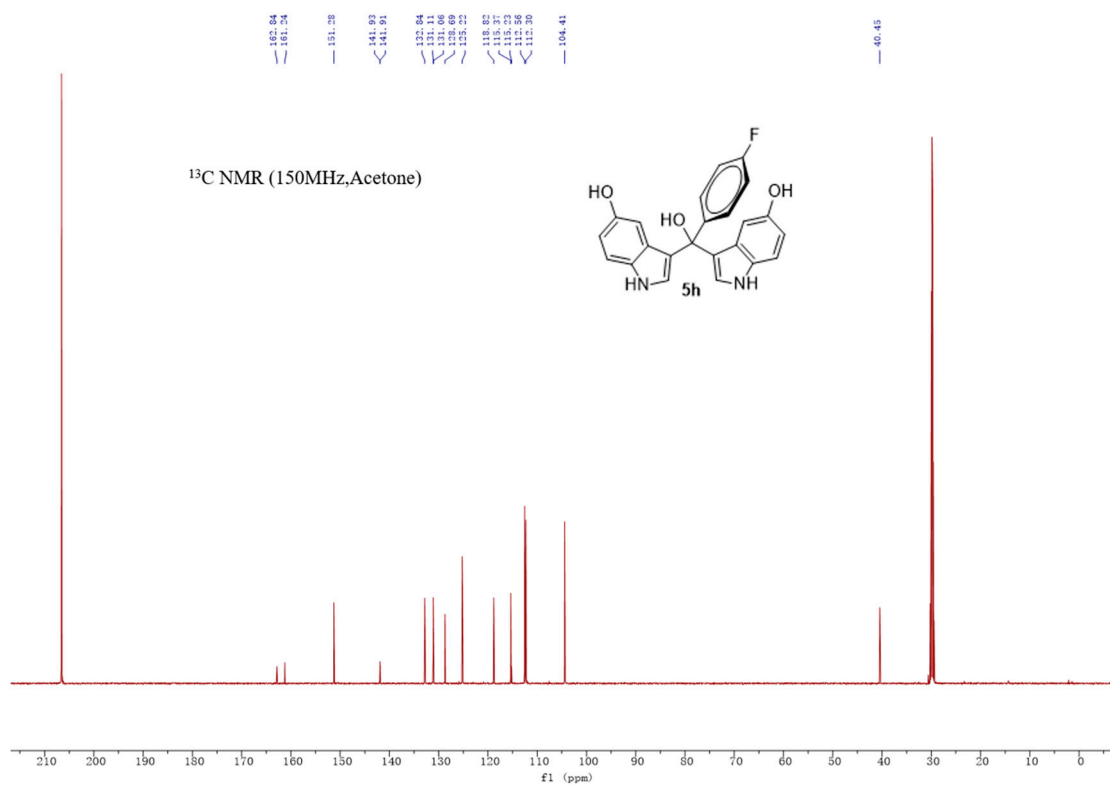

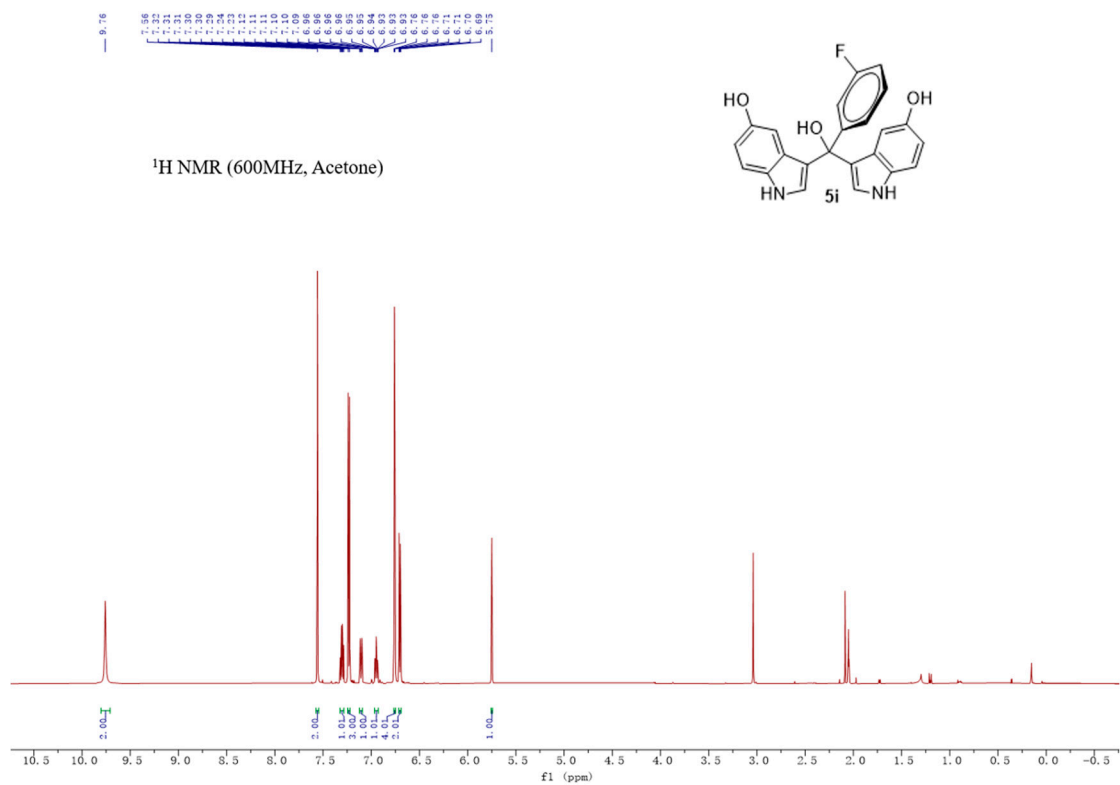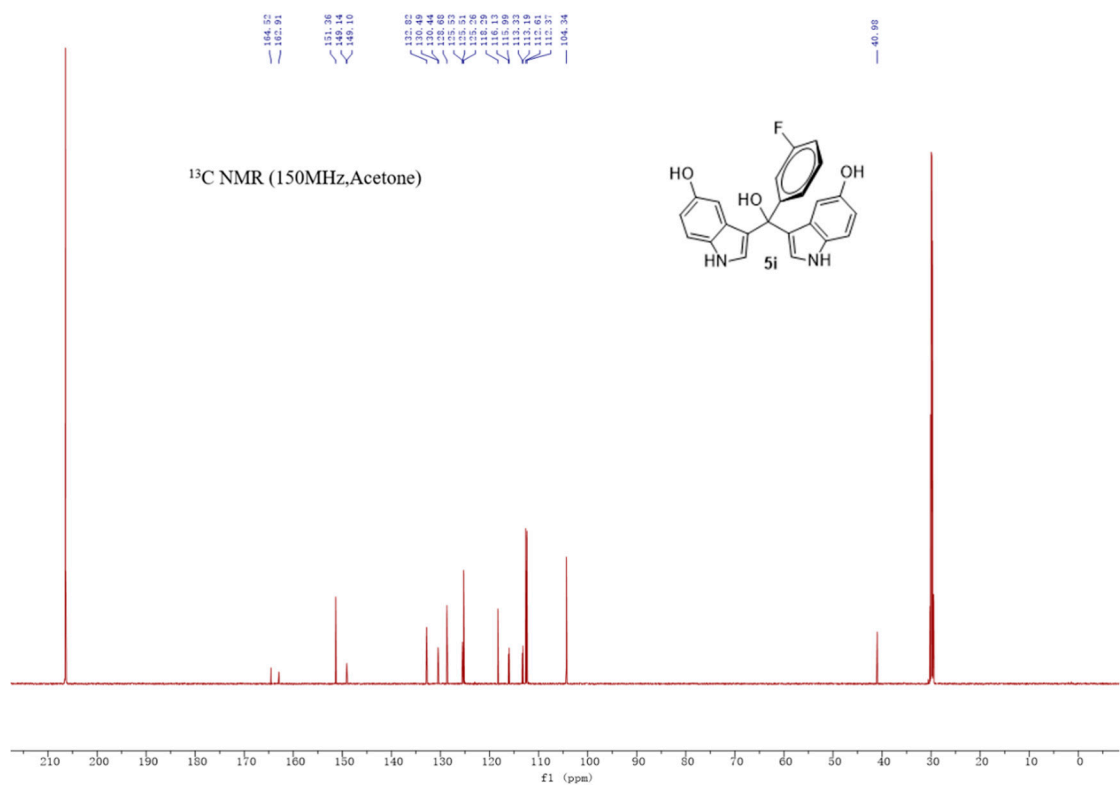

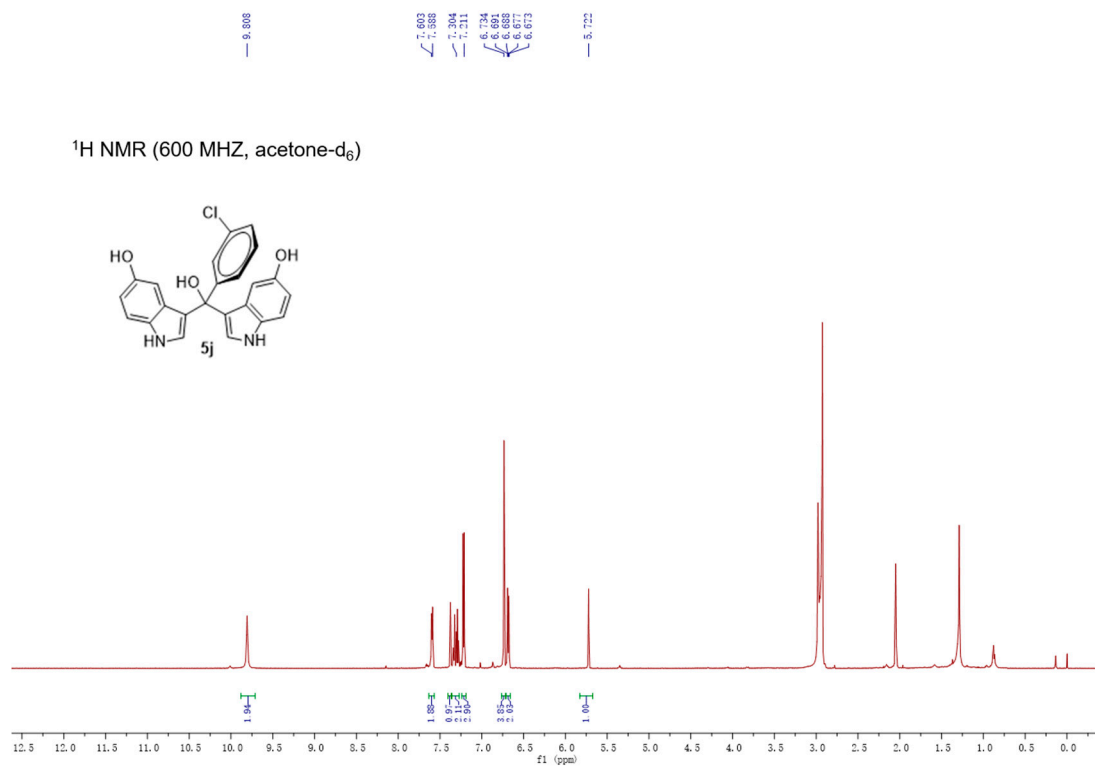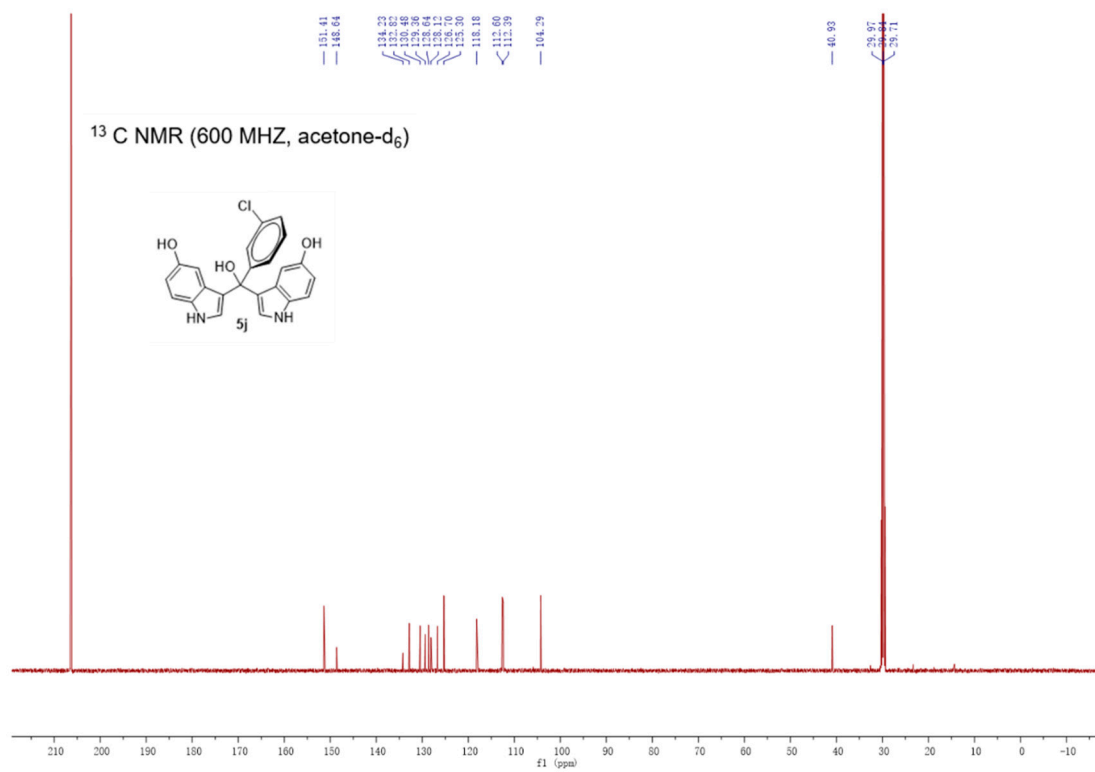



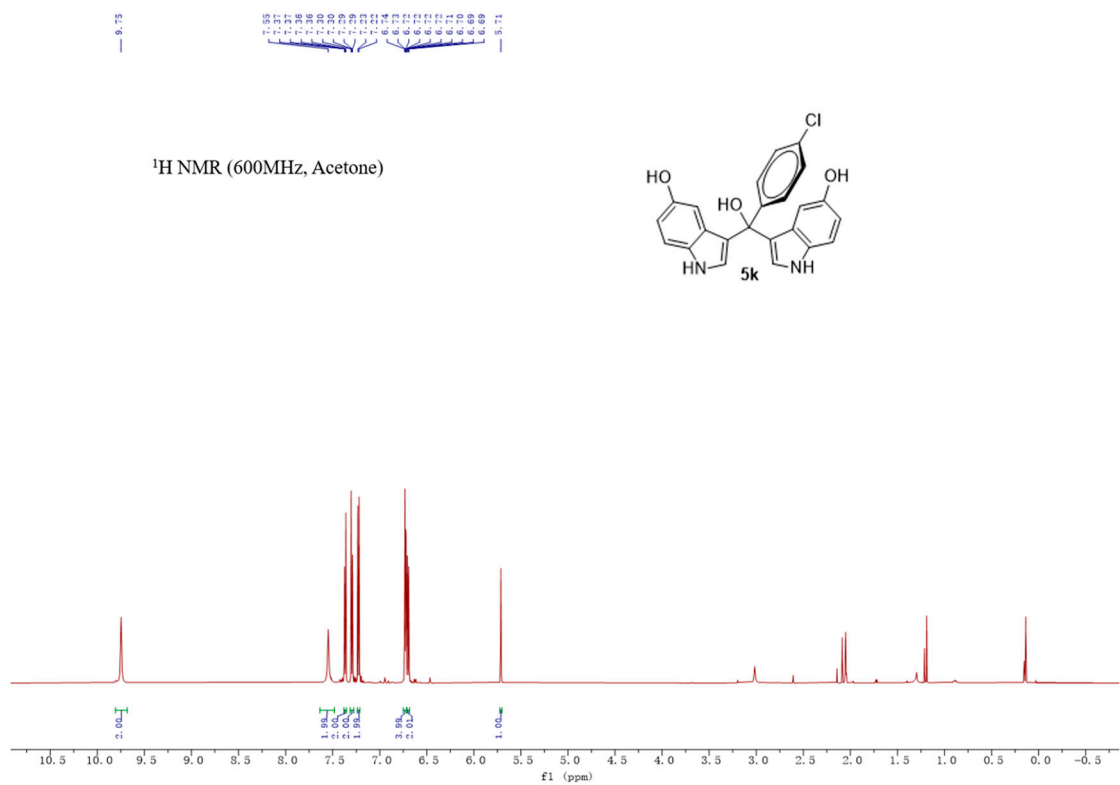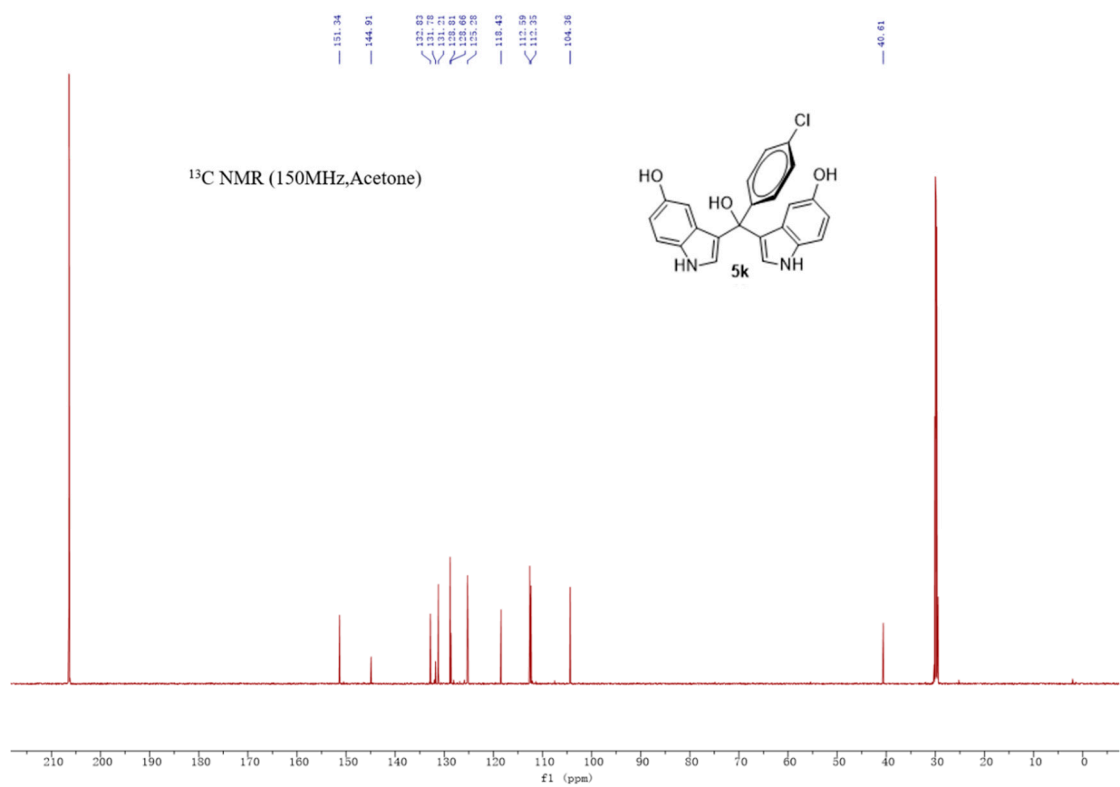

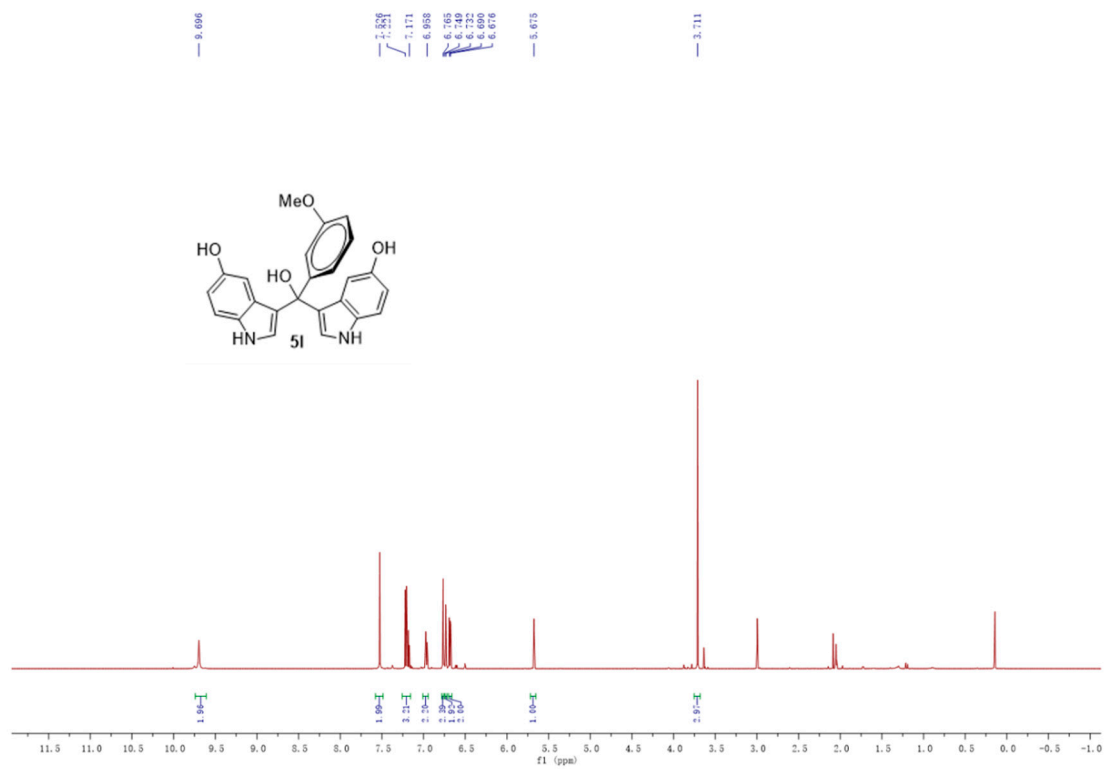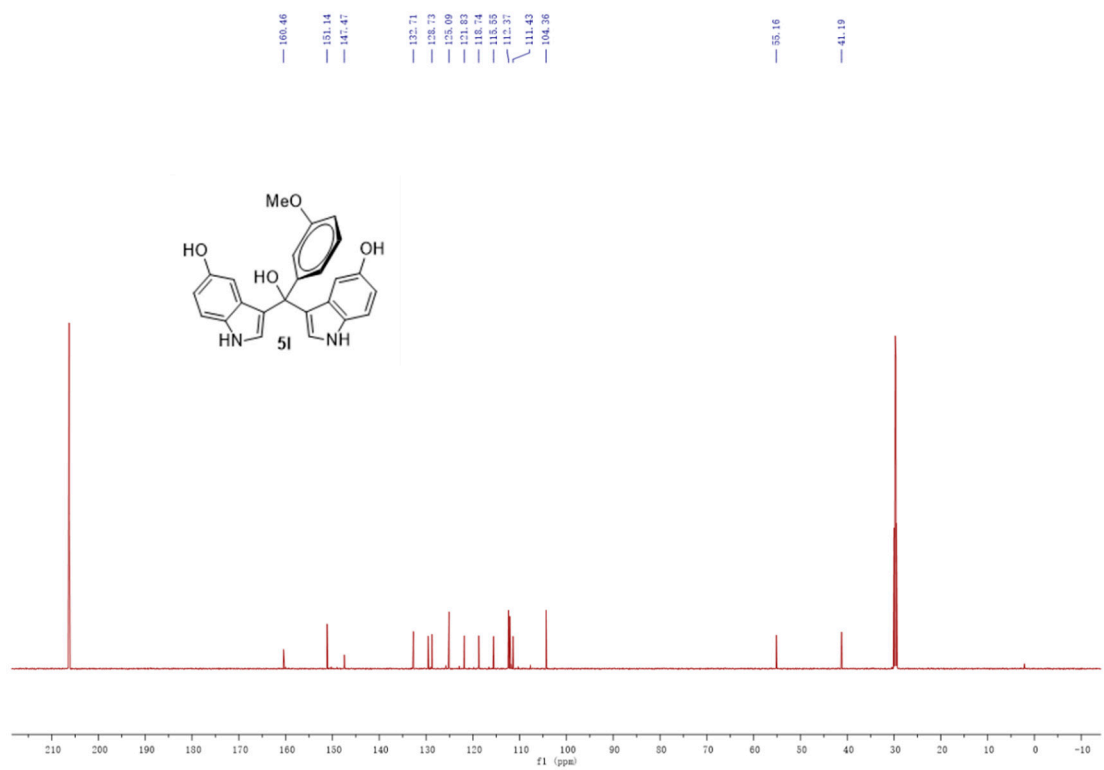



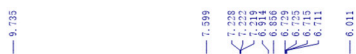

**<sup>1</sup>H NMR (600 MHz, acetone-d<sub>6</sub>)**

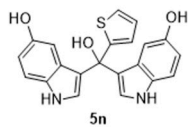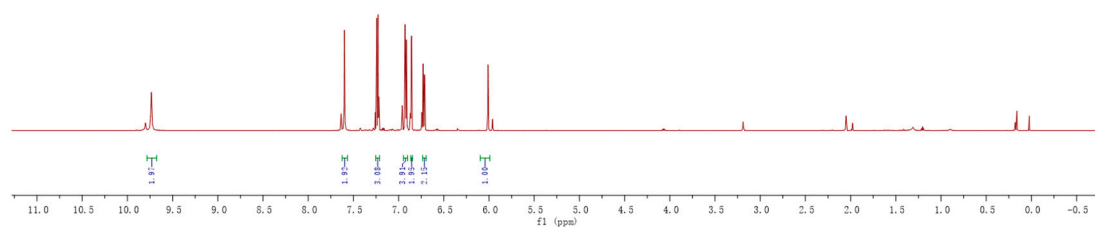

**<sup>13</sup>C NMR (150MHz,Acetone-d<sub>6</sub>)**

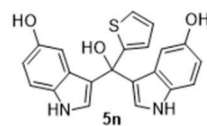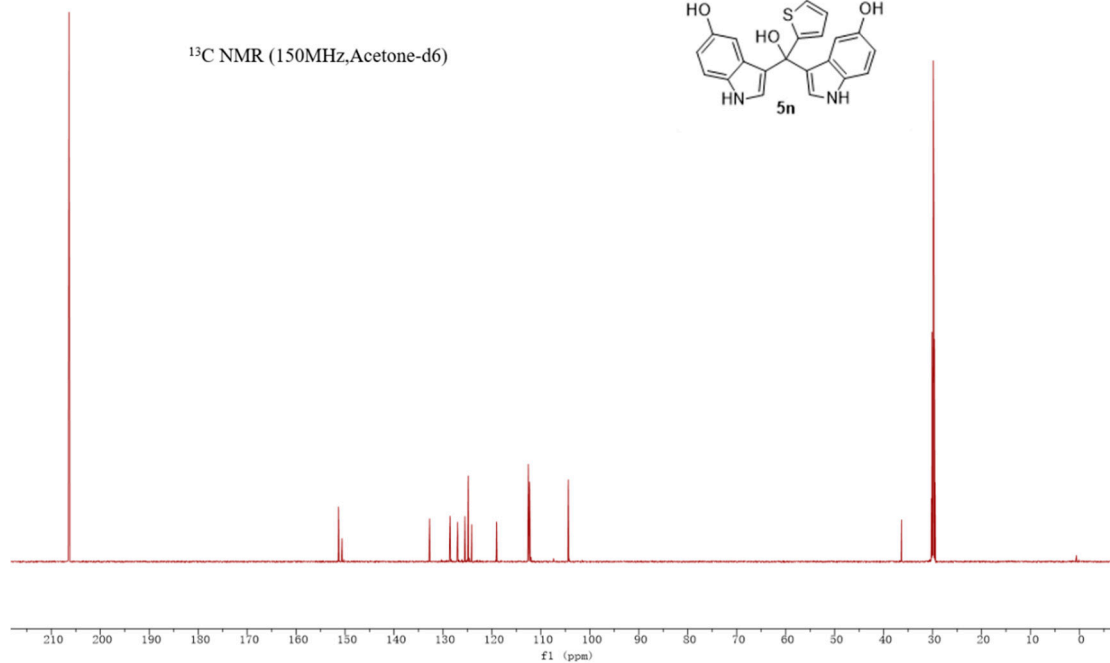

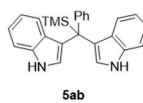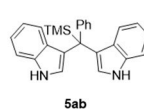

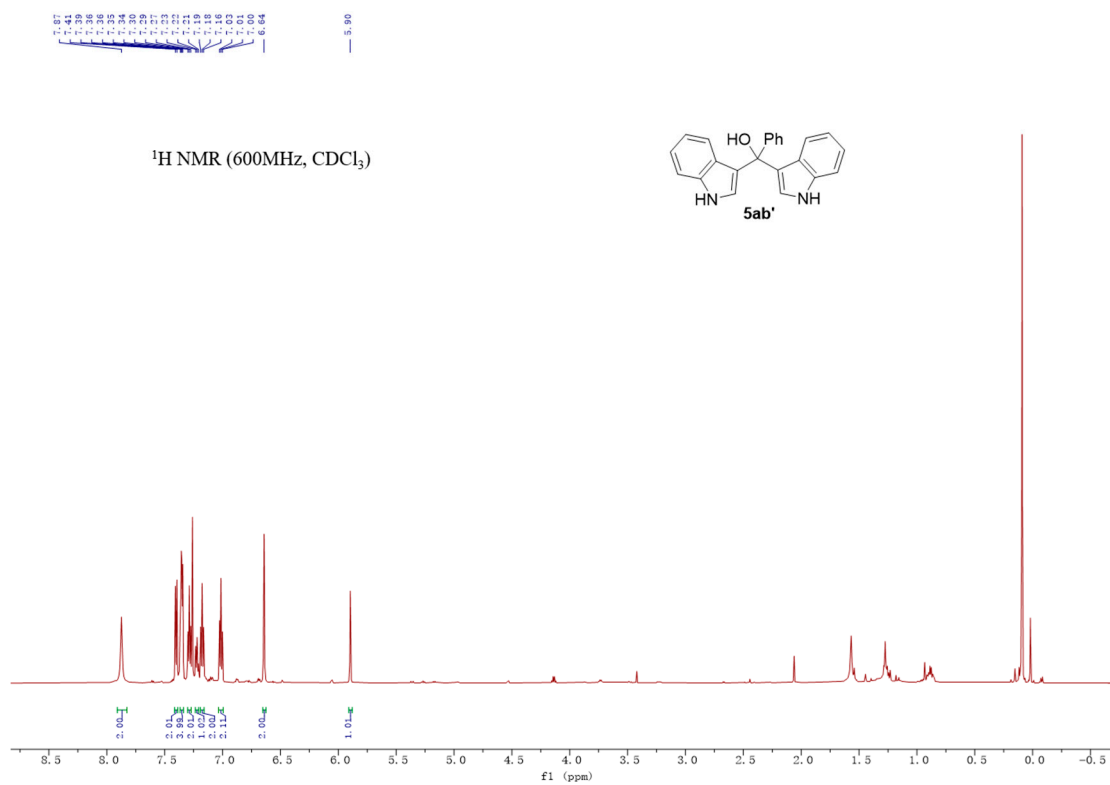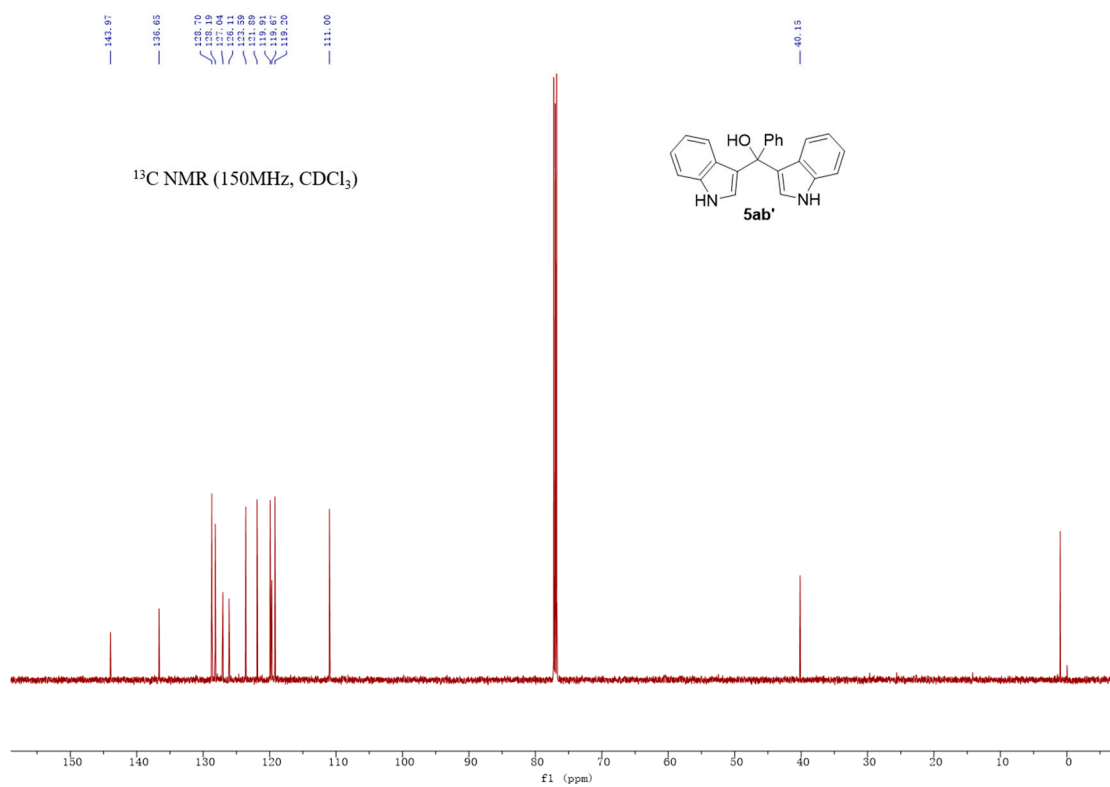

Supplement: s1 [file s1]
